# Supplementary material for: ZCWPW1 is recruited to recombination hotspots by PRDM9 and is essential for meiotic double strand break repair
Source: eLife. 2020 Aug 3;9:e53392. doi: 10.7554/eLife.53392 (PMC7494361; doi:10.7554/eLife.53392)
Supplement: Figure 1—source data 1. — Notes on Table columns: aThe number of 31 perfectly conserved amino acids within strong ZCWPW1 orthologues that match, and are sequenced/align, respectively. bThe number of 78 moderately conserved (entropy <1) amino acids within strong ZCWPW1 orthologues that match, and are sequenced/align, respectively. cStart and end positions of alignment to human reference ZCWPW1. dThe taxonomic relationship of this species to the closest species possessing a copy of PRDM9 with a likely functional SET domain (Baker et al., 2017). eThe number of 37 amino acids, which do not vary in species also shown to possess a copy of PRDM9 with a likely functional SET domain (Baker et al., 2017), which mismatch the expected amino acid in this copy of ZCWPW1 (0 for cases with a perfect match). [file elife-53392-fig1-data1.xlsx]

## Sheet: Fig1_Source_Data_1
ZCWPW1 identified orthologues
Species name	Common name	Major clade	IDs	Cons_score_31a	Cons_score_78b	Total_align_31a	Total_align_78b	Align_startc	Align_endc	Closest_PRDM9_relatived	Poss_nonconserved_AA_totale		Notes on Table columns
Pongo abelii	Orangutan	Placental	>ENSPPYP00000019513,PNJ12277.1,XP_024105647.1,PNJ12279.1,PNJ12278.1,XM_024249879	1	0.976024	31	79	1	648	Species	0		aThe number of 31 perfectly conserved amino acids within strong ZCWPW1 orthologues that match, and are sequenced/align, respectively
Latimeria chalumnae	Coelacanth	Coelacanth	>ENSLACP00000022745,XP_014346151.1,XP_005999849.2,XM_014490665,XM_005999787	1	0.958159	31	79	99	430	Species	0		bThe number of 78 moderately conserved (entropy <1) amino acids within strong ZCWPW1 orthologues that match, and are sequenced/align, respectively
Myotis lucifugus	Microbat	Placental	>ENSMLUP00000008794,XP_023613669.1,XP_023609932.1,XM_023757901,XM_023754164	1	0.987208	31	79	1	641	Species	0		cStart and end positions of alignment to human reference ZCWPW1
Lepisosteus oculatus	Spotted gar	Bony fish	>ENSLOCP00000016746,XP_015195987.1,XP_015195985.1,XM_015340502,XM_015340501,XM_015340499	1	0.903037	31	79	99	443	Species	0		dThe taxonomic relationship of this species to the closest species possessing a copy of PRDM9 with a likely functional SET domain (Baker et al. 2017)
Ailuropoda melanoleuca	Panda	Placental	>ENSAMEP00000015870,XP_019663561.1,EFB16445.1,XP_019663553.1,XP_019663560.1,XP_019663559.1,XP_019663558.1,XP_019663557.1,XP_019663556.1,XP_019663555.1,XP_019663554.1,XM_019808001,XM_019808000,XM_019807998,XM_019807996,XM_019807995,XM_019807999,XM_019807994,XM_019808002,XM_019807997	1	0.987208	31	79	1	646	Species	0		eThe number of 37 amino acids, which do not vary in species also shown to possess a copy of PRDM9 with a likely functional SET domain (Baker et al. 2017), which mismatch the expected amino acid in this copy of ZCWPW1 (0 for cases with a perfect match)
Echinops telfairi	Lesser hedgehog tenrec	Placental	>ENSETEP00000014588,XP_012860881.1,XM_013005427	1	0.987208	31	79	2	466	Species	0
Petromyzon marinus	Lamprey	Jawless fish	>ENSPMAP00000007319	0.935484	0.802272	31	79	255	430	Species	0
Dasypus novemcinctus	Armadillo	Placental	>ENSDNOP00000002014	1	0.987208	31	79	1	624	Species	0
Loxodonta africana	Elephant	Placental	>ENSLAFP00000028794	1	0.987208	31	79	2	646	Species	0
Pteropus vampyrus	Megabat	Placental	>ENSPVAP00000011305,XP_023393300.1,XP_011369957.1,XM_011371655,XM_023537532	1	0.987208	31	79	1	635	Species	0
Mustela putorius furo	Ferret	Placental	>ENSMPUP00000015561,XP_012916466.1,XP_012916465.1,XM_013061012,XM_013061011	1	0.987208	31	79	2	646	Species	0
Chlorocebus sabaeus	Vervet-agm	Placental	XP_008017147.1,XM_008018956	1	0.925501	31	79	26	648	Species	0
Tursiops truncatus	Dolphin	Placental	XP_019786147.1,XP_019786151.1,XP_019786155.1,XP_019786150.1,XP_019786149.1,XP_019786148.1,XM_019930596,XM_019930592,XM_019930591,XM_019930590,XM_019930589,XM_019930588	1	0.987208	31	79	1	639	Species	0
Otolemur garnettii	Bushbaby	Placental	>ENSOGAP00000009858,XP_023374351.1,XM_023518583	1	0.987208	31	79	1	646	Species	0
Oryctolagus cuniculus	Rabbit	Placental	>ENSOCUP00000012373,XP_008256244.1,XP_008256243.1,XP_017198079.1,XP_008256245.1,XP_008256246.1,XP_017198083.1,XP_017198085.1,XP_017198082.1,XP_017198078.1,XP_017198077.1,XM_017342589,XM_017342596,XM_008258023,XM_008258022,XM_017342588,XM_008258024,XM_017342593,XM_017342594,XM_008258021,XM_017342590	1	0.976024	31	79	1	646	Species	0
Ochotona princeps	Pika	Placental	>ENSOPRP00000013510	1	0.974567	31	79	1	636	Species	0
Ornithorhynchus anatinus	Platypus	Monotremata	XP_028911820.1,XP_028911819.1,XM_029055986,XM_029055987	1	0.979381	31	79	59	445	Species	0
Ovis aries	Sheep	Placental	>ENSOARP00000018230,XP_011959942.2,XP_014959722.2,XM_015104236,XM_012104552	1	0.987208	31	79	1	639	Species	0
Sarcophilus harrisii	Tasmanian devil	Marsupial	>ENSSHAP00000000215	1	0.99416	31	79	250	645	Species	0
Macaca mulatta	Macaque	Placental	>ENSMMUP00000035445	1	0.976024	31	79	1	648	Species	0
Vicugna pacos	Alpaca	Placental	XP_006219217.1,XM_006219155	1	0.987208	31	79	1	646	Species	0
Sorex araneus	Shrew	Placental	>ENSSARP00000002907	1	0.9767	31	79	2	490	Species	0
Erinaceus europaeus	Hedgehog	Placental	>ENSEEUP00000003988	1	1	18	57	96	450	Species	0
Macropus eugenii	Wallaby	Marsupial	>ENSMEUP00000001250	1	0.94825	31	79	122	630	Species	0
Heterocephalus glaber	Naked mole-rat	Placental	>ENSHGLP00000024104,>ENSHGLP00100020406,XP_021110173.1,XM_021254514	1	0.972367	31	79	1	631	Species	0
Mesocricetus auratus	Golden hamster	Placental	>ENSMAUP00000020986,XP_021088779.1,XM_021233120	1	0.959089	31	79	1	646	Species	0
Sus scrofa	Pig usmarc	Placental	>ENSSSCP00000055870,>ENSSSCP00070026133,XP_005661955.1,XP_013850885.1,XP_013850891.1,XP_005661963.1,XP_013850890.1,XP_013850892.1,XP_013850886.1,XM_013995436,XM_005661898,XM_013995437,XM_005661906,XM_013995431,XM_013995432,XM_013995438	1	0.987208	31	79	1	646	Species	0
Cricetulus griseus	Chinese hamster picr	Placental	>ENSCGRP00000011495,>ENSCGRP00001014294,>ENSCGRP00015014366,XP_007649437.1,XP_007649436.1,XP_016835258.1,XP_016835257.1,XP_007649438.1,XP_016835259.1,XP_027272064.1,XP_027272063.1,XP_027272062.1,XP_027272061.1,XP_027272060.1,XP_027272059.1,XP_027272058.1,XP_027298093.1,XM_027416263,XM_027416262,XM_027416258,XM_027416260,XM_027416257,XM_027416261,XM_027416259,XM_007651248,XM_016979768,XM_016979770…	1	0.964929	31	79	1	646	Species	0
Microtus ochrogaster	Prairie vole	Placental	>ENSMOCP00000007902,XP_005371516.1,XM_005371459	1	0.959089	31	79	1	646	Species	0
Chinchilla lanigera	Long-tailed chinchilla	Placental	>ENSCLAP00000005183,XP_013364930.1,XP_005413785.1,XP_005413787.1,XP_005413786.1,XM_005413730,XM_013509476,XM_005413729,XM_005413728	1	0.975138	31	79	2	631	Species	0
Rattus norvegicus	Rat	Placental	>ENSRNOP00000032071,XP_003751196.1,XM_006221320,XM_003752574	1	0.979319	31	79	2	646	Species	0
Ictidomys tridecemlineatus	Squirrel	Placental	>ENSSTOP00000020308	1	0.974571	31	79	1	646	Species	0
Fukomys damarensis	Damara mole rat	Placental	>ENSFDAP00000008093,XP_019060878.1,XM_019205333	1	0.972367	31	79	1	623	Species	0
Nannospalax galili	Upper galilee mountains blind mole rat	Placental	>ENSNGAP00000025322,XP_008830596.1,XP_008830595.1,XP_008830591.1,XP_008830593.1,XP_008830590.1,XP_008830594.1,XP_008830592.1,XM_008832373,XM_008832374,XM_008832372,XM_029563206,XM_008832371,XM_029563205,XM_008832368,XM_008832370,XM_008832369	1	0.987208	31	79	1	646	Species	0
Cercocebus atys	Sooty mangabey	Placental	>ENSCATP00000036158	1	0.925392	31	79	1	648	Species	0
Pan troglodytes	Chimpanzee	Placental	>ENSPTRP00000088019,>ENSPTRP00000056497,XP_016801643.1,XP_016801642.1,XP_016801636.1,XP_016801647.1,XP_016801646.1,XP_016801648.1,XP_016801651.1,XP_016801653.1,XP_016801649.1,XP_016801652.1,XP_016801644.1,XP_016801641.1,XP_016801640.1,XP_016801638.1,XP_016801637.1,JAA40778.1,PNI92788.1,PNI92786.1,PNI92785.1,XM_016946158,XM_016946152,XM_016946154,XM_016946157,XM_016946162,XM_016946155,XM_016946163…	1	0.976024	31	79	1	648	Species	0
Macaca nemestrina	Pig-tailed macaque	Placental	>ENSMNEP00000034798	1	0.915058	31	79	1	648	Species	0
Propithecus coquereli	Coquerels sifaka	Placental	XP_012494337.1,XM_012638883	1	0.9767	31	79	1	646	Species	0
Papio anubis	Olive baboon	Placental	>ENSPANP00000005992,XP_017812094.2,XP_017812093.2,XP_009200966.2,XP_017812092.2,XP_017812091.2,XP_017812089.2,XP_009200972.2,XP_021791375.1,XP_017812096.2,XP_021791374.1,XP_017812090.2,XM_017956605,XM_017956604,XM_009202702,XM_017956602,XM_021935682,XM_017956601,XM_017956600,XM_017956603,XM_009202708,XM_021935683,XM_017956607	1	0.976024	31	79	1	648	Species	0
Colobus angolensis palliatus	Angola colobus	Placental	>ENSCANP00000014345,XP_011799293.1,XP_011799296.1,XP_011799295.1,XM_011943903,XM_011943905,XM_011943906	1	0.963403	31	79	1	648	Species	0
Nomascus leucogenys	Gibbon	Placental	>ENSNLEP00000014257,XP_012351651.1,XM_012496197	1	0.976024	31	79	1	648	Species	0
Mandrillus leucophaeus	Drill	Placental	XP_011841215.1,XM_011985825	1	0.925501	31	79	1	648	Species	0
Macaca fascicularis	Crab-eating macaque	Placental	>ENSMFAP00000025212,EHH62178.1,XP_015302634.1,XP_015302633.1,XP_015302632.1,XP_015302631.1,XP_015302635.1,XP_005549276.1,XP_015302639.1,XP_015302637.1,XP_015302638.1,XM_015447148,XM_015447153,XM_015447146,XM_015447152,XM_015447147,XM_015447149,XM_015447145,XM_005549219,XM_015447151	1	0.976024	31	79	1	648	Species	0
Pan paniscus	Bonobo	Placental	>ENSPPAP00000027780,XP_003812968.1,XP_024785297.1,XP_008963690.1,XP_008963688.1,XP_024785299.1,XP_024785298.1,XP_008963694.1,XP_008963693.1,XP_003812969.1,XP_008963689.1,XM_008965446,XM_024929531,XM_008965442,XM_003812920,XM_003812921,XM_008965445,XM_008965441,XM_024929530,XM_008965440,XM_024929529	1	0.976024	31	79	1	648	Species	0
Rhinopithecus roxellana	Golden snub-nosed monkey	Placental	>ENSRROP00000008025,XP_010376011.1,XM_010377709	1	0.976024	31	79	1	648	Species	0
Carlito syrichta	Tarsier	Placental	>ENSTSYP00000008808,XP_008065282.1,XM_008067091	1	0.977711	31	79	2	624	Species	0
Gorilla gorilla gorilla	Gorilla	Placental	>ENSGGOP00000005254,XP_004045950.1,XP_018887011.1,XP_018887010.1,XP_018887005.1,XP_018887012.1,XP_004045951.1,XP_018887014.1,XP_018887009.1,XP_018887008.1,XP_018887007.1,XP_018887006.1,XM_019031465,XM_004045903,XM_004045902,XM_019031464,XM_019031463,XM_019031462,XM_019031461,XM_019031467,XM_019031460,XM_019031466,XM_019031469	1	0.976024	31	79	1	648	Species	0
Felis catus	Cat	Placental	>ENSFCAP00000010035,XP_019676061.1,XP_011288698.1,XP_011288697.1,XM_019820502,XM_011290396,XM_011290395	1	0.987208	31	79	1	622	Species	0
Panthera tigris altaica	Tiger	Placental	>ENSPTIP00000018076,XP_015393808.1,XP_015393805.1,XM_015538322,XM_015538319	1	0.987208	31	79	1	622	Species	0
Astyanax mexicanus	Mexican tetra	Bony fish	>ENSAMXP00000020465,XP_022533204.1,XP_015457013.2,XM_022677483,XM_015601527	0.903226	0.747974	31	79	254	443	Species	0
Microcebus murinus	Mouse lemur	Placental	XP_020137046.1,XP_012614832.2,XP_012614836.2,XP_020137044.1,XP_012614833.2,XP_012614835.2,XP_012614834.2,XM_020281455,XM_012759379,XM_012759382,XM_012759378,XM_020281457,XM_012759381,XM_012759380	1	0.966192	31	79	1	646	Species	0
Chrysemys picta bellii	Painted turtle	Turtles,tortoises	>ENSCPBP00000022945,XP_023969024.1,XP_023969023.1,XM_024113256,XM_024113255	1	0.983591	31	79	57	472	Species	0
Bos mutus	Wild yak	Placental	>ENSBMUP00000032216,XP_005893209.1,ELR58259.1,XM_005893147	1	0.987208	31	79	1	639	Species	0
Pogona vitticeps	Central bearded dragon	Squamata	>ENSPVIP00000013907,XP_020655405.1,XM_020799746	1	0.925901	31	79	15	646	Species	0
Phascolarctos cinereus	Koala	Marsupial	>ENSPCIP00000015818,XP_020834782.1,XP_020834790.1,XP_020834789.1,XP_020834791.1,XP_020834788.1,XP_020834787.1,XP_020834785.1,XP_020834784.1,XP_020834783.1,XM_020979129,XM_020979130,XM_020979123,XM_020979125,XM_020979126,XM_020979131,XM_020979124,XM_020979128,XM_020979132	1	0.99416	31	79	1	621	Species	0
Bison bison bison	American bison	Placental	>ENSBBBP00000027116,XP_010836191.1,XP_010836192.1,XM_010837889,XM_010837890	1	0.987208	31	79	2	639	Species	0
Marmota marmota marmota	Alpine marmot	Placental	>ENSMMMP00000013927,XP_015346198.1,XM_015490712	1	0.987208	31	79	1	646	Species	0
Bos taurus	Cow	Placental	>ENSBTAP00000001417,NP_001070321.1,DAA15062.1,AAI23660.1,NM_001076853,BC123659	1	0.987208	31	79	1	639	Species	0
Peromyscus maniculatus bairdii	Northern american deer mouse	Placental	>ENSPEMP00000000717,XP_015856879.1,XP_015856876.1,XP_015856882.1,XM_016001396,XM_016001390,XM_016001393	1	0.959089	31	79	1	646	Species	0
Equus caballus	Horse	Placental	>ENSECAP00000019855,XP_023511105.1,XP_023511103.1,XP_023511106.1,XP_023511104.1,XM_023655336,XM_023655335,XM_023655338,XM_023655337	1	0.976024	31	79	1	646	Species	0
Mus musculus	Mouse	Placental	>ENSMUSP00000048730,EDL19233.1,NP_001005426.2,AAX39493.1,Q6IR42.2,NP_001346952.1,NM_001005426,NM_001360023	1	0.973479	31	79	1	646	Species	0
Homo sapiens	Human	Placental	>ENSP00000381109,NP_060454.3,XP_006716101.1,XP_006716100.1,XP_006716098.1,XP_016801641.1,BAG63489.1,EAW76539.1,ALQ34136.1,ALQ34137.1,CAB66669.1,NP_001244937.1,XP_005250536.1,ALQ34135.1,AAH02725.1,BAC04028.1,ALQ34139.1,ALQ34138.1,Q9H0M4.2,XP_024302584.1,XP_006716099.1,EAW76541.1,EAW76540.1,EAW76538.1,KU178677,KU178681,KU178679,AK300745,AK000919,NM_017984,NM_001258008,AK302108,AL136735,BC002725,XM_…	1	0.976024	31	79	1	648	Species	0
Equus przewalskii	Przewalski's horse	Placental	XP_008525539.1,XP_008525540.1,XM_008527318,XM_008527317	1	0.976024	31	79	1	646	Species	0
Orcinus orca	Killer whale	Placental	XP_012388193.1,XP_012388194.1,XM_012532740,XM_012532739	1	0.987208	31	79	1	639	Species	0
Ceratotherium simum simum	Southern white rhinoceros	Placental	XP_014652644.1,XM_014797158	1	0.959812	31	79	1	646	Species	0
Ursus maritimus	Polar bear	Placental	XP_008696640.1,XM_008698418	1	0.987208	31	79	1	646	Species	0
Pteropus alecto	Black flying fox	Placental	XP_024907314.1,ELK06940.1,XP_015450074.1,XP_024907315.1,XM_015594588,XM_025051547,XM_025051546	1	0.987208	31	79	1	635	Species	0
Tupaia chinensis	Chinese tree shrew	Placental	XP_014446074.1,XM_014590588	1	0.965872	31	79	1	646	Species	0
Camelus ferus	Wild bactrian camel	Placental	XP_014423419.1,XM_014567933	1	0.987208	31	79	1	639	Species	0
Camelus dromedarius	Arabian camel	Placental	XP_010998235.1,XM_010999933	1	0.987208	31	79	1	639	Species	0
Balaenoptera acutorostrata scammoni	Minke whale	Placental	XP_007186711.1,XM_007186649	1	0.987208	31	79	1	638	Species	0
Lipotes vexillifer	Yangtze river dolphin	Placental	XP_007468922.1,XM_007468860	1	0.987208	31	79	1	639	Species	0
Rousettus aegyptiacus	Egyptian rousette	Placental	XP_015980286.1,XP_015980285.1,XP_015980291.1,XP_015980290.1,XP_015980289.1,XP_015980288.1,XP_015980287.1,XM_016124799,XM_016124805,XM_016124804,XM_016124803,XM_016124801,XM_016124802,XM_016124800	1	0.987208	31	79	1	622	Species	0
Chrysochloris asiatica	Cape golden mole	Placental	XP_006859877.1,XM_006859815	1	0.987208	31	79	1	646	Species	0
Galeopterus variegatus	Sunda flying lemur	Placental	XP_008578945.1,XM_008580723	1	0.976024	31	79	1	646	Species	0
Myotis davidii	Davids myotis	Placental	ELK29523.1,XP_015420026.1,XP_015420028.1,XP_015420027.1,XM_015564542,XM_015564540,XM_015564541	1	0.987208	31	79	1	641	Species	0
Ovis aries musimon	European mouflon	Placental	XP_011997062.1,XP_014963552.1,XM_015108066,XM_012141672	1	0.987208	31	79	1	639	Species	0
Myotis brandtii	Brandt's bat	Placental	XP_005861206.1,XP_005861208.1,XP_005861207.1,XP_014391005.1,EPQ04547.1,XM_005861146,XM_014535519,XM_005861144,XM_005861145	1	0.987208	31	79	1	635	Species	0
Condylura cristata	Star-nosed mole	Placental	XP_004691686.1,XP_012587261.1,XM_004691629,XM_012731807	1	0.987208	31	79	1	646	Species	0
Odobenus rosmarus divergens	Pacific walrus	Placental	XP_012417372.1,XM_012561918	1	0.987208	31	79	1	646	Species	0
Camelus bactrianus	Bactrian camel	Placental	XP_010955305.1,XM_010957003	1	0.987208	31	79	1	639	Species	0
Bubalus bubalis	Water buffalo	Placental	XP_025131149.1,XP_025131146.1,XP_025131148.1,XP_025131147.1,XM_025275362,XM_025275363,XM_025275364,XM_025275361	1	0.987208	31	79	1	639	Species	0
Eptesicus fuscus	Big brown bat	Placental	XP_028001011.1,XM_028145210	1	0.987208	31	79	1	641	Species	0
Acinonyx jubatus	Cheetah	Placental	XP_014941209.1,XP_026897912.1,XP_014941208.1,XM_015085723,XM_027042111,XM_015085722	1	0.987208	31	79	1	622	Species	0
Trichechus manatus latirostris	Florida manatee	Placental	XP_023596857.1,XM_023741089	1	0.987208	31	79	2	453	Species	0
Miniopterus natalensis	Natal long-fingered bat	Placental	XP_016073351.1,XM_016217865	1	0.976024	31	79	1	455	Species	0
Jaculus jaculus	Lesser egyptian jerboa	Placental	XP_012806046.1,XM_012950592	1	0.974805	31	79	1	452	Species	0
Physeter catodon	Sperm whale	Placental	XP_028353849.1,XM_028498048	1	0.982797	31	79	247	639	Species	0
Octodon degus	Degu	Placental	XP_023570087.1,XM_023714319	1	0.962495	31	79	92	521	Species	0
Pelodiscus sinensis	Chinese soft-shelled turtle	Turtles,tortoises	XP_025036232.1,XP_006114723.1,XP_025036236.1,XP_025036231.1,XP_025036230.1,XP_025036229.1,XM_025180446,XM_025180445,XM_025180444,XM_006114661,XM_025180447,XM_025180451	1	0.979626	31	79	16	558	Species	0
Chelonia mydas	Green sea turtle	Turtles,tortoises	XP_027678182.1,XM_027822381	1	0.967012	30	69	46	386	Species	0
Python bivittatus	Burmese python	Squamata	XP_025030175.1,XM_025174407	1	0.932541	31	79	81	646	Species	0
Thamnophis sirtalis	Common garter snake	Squamata	XP_013929882.1,XM_014074407	1	0.930905	31	79	217	429	Species	0
Protobothrops mucrosquamatus	Pit viper	Squamata	XP_029139402.1,XM_029283569	1	0.931211	31	79	251	451	Species	0
Rhincodon typus	Whale shark	Cartilaginous fish	XP_020390085.1,XM_020534496	1	0.918446	31	79	254	431	Species	0
Ictalurus punctatus	Channel catfish	Bony fish	XP_017342036.1,XM_017486547	1	0.835174	31	79	252	441	Species	0
Salmo salar	Atlantic salmon	Bony fish	XP_014039000.1,XM_014183525	1	0.812601	31	79	256	525	Species	0
Pygocentrus nattereri	Red-bellied piranha	Bony fish	XP_017541779.1,XM_017686290	0.967742	0.785273	31	79	237	437	Species	0
Esox lucius	Northern pike	Bony fish	XP_028973752.1,XM_029117919	0.935484	0.790251	31	79	248	446	Species	0
Ophiophagus hannah	King cobra	Squamata	ETE59233.1	0.933334	0.790457	30	69	246	382	Species	0
Rhinopithecus bieti	Black snub-nosed monkey	Placental	>ENSRBIP00000020335,XP_017741519.1,XP_017741523.1,XP_017741525.1,XP_017741526.1,XP_017741522.1,XP_017741521.1,XP_017741520.1,XM_017886036,XM_017886032,XM_017886037,XM_017886033,XM_017886030,XM_017886031,XM_017886034	1	0.976024	31	79	1	648	Genus	0
Panthera pardus	Leopard	Placental	>ENSPPRP00000009657,XP_019278282.1,XP_019278280.1,XP_019278279.1,XM_019422737,XM_019422735,XM_019422734	1	0.987208	31	79	1	622	Genus	0
Equus asinus asinus	Donkey	Placental	>ENSEASP00005025096	1	0.925392	31	79	122	453	Genus	0
Mus spicilegus	Steppe mouse	Placental	>ENSMSIP00000008513	1	0.973479	31	79	1	646	Genus	0
Bos indicus x Bos taurus	Hybrid - bos taurus	Placental	>ENSBIXP00005032437,>ENSBIXP00000026570,XP_027384112.1,XP_027384113.1,XM_027528312,XM_027528311	1	0.987208	31	79	1	639	Genus	0
Equus asinus	Ass	Placental	XP_014709479.1,XM_014853993	1	0.976024	31	79	1	646	Genus	0
Ursus arctos horribilis	Brown bear	Placental	XP_026371926.1,XM_026516141	1	0.987208	31	79	10	646	Genus	0
Bos indicus	Zebu cattle	Placental	XP_019843815.1,XM_019988256	1	0.987208	31	79	1	639	Genus	0
Marmota flaviventris	Yellow-bellied marmot	Placental	XP_027808738.1,XM_027952937	1	0.987208	31	79	82	646	Genus	0
Peromyscus leucopus	White-footed mouse	Placental	XP_028718774.1,XM_028862941	1	0.959089	31	79	1	646	Genus	0
Mus caroli	Ryukyu mouse	Placental	XP_021018908.1,XM_021163249	1	0.973479	31	79	1	646	Genus	0
Mus pahari	Shrew mouse	Placental	XP_021042862.1,XM_021187203	1	0.973479	31	79	98	439	Genus	0
Capra hircus	Goat	Placental	>ENSCHIP00000028608,XP_005697886.1,XM_005697829	1	0.987208	31	79	1	639	Family	0
Neovison vison	American mink	Placental	>ENSNVIP00000001049	1	0.987208	31	79	1	646	Family	0
Urocitellus parryii	Arctic ground squirrel	Placental	>ENSUPAP00010022701,XP_026268939.1,XP_026268944.1,XP_026268946.1,XP_026268949.1,XP_026268948.1,XP_026268947.1,XP_026268943.1,XP_026268942.1,XP_026268941.1,XP_026268940.1,XM_026413159,XM_026413164,XM_026413158,XM_026413157,XM_026413156,XM_026413155,XM_026413154,XM_026413163,XM_026413162,XM_026413161	1	0.987208	31	79	1	646	Family	0
Spermophilus dauricus	Daurian ground squirrel	Placental	>ENSSDAP00000023837	1	0.987208	31	79	1	646	Family	0
Meriones unguiculatus	Mongolian gerbil	Placental	>ENSMUGP00000018151,XP_021506338.1,XP_021506345.1,XP_021506346.1,XP_021506340.1,XP_021506339.1,XM_021650663,XM_021650665,XM_021650671,XM_021650670,XM_021650664	1	0.972367	31	79	1	646	Family	0
Piliocolobus tephrosceles	Ugandan red colobus	Placental	>ENSPTEP00000024411,XP_023052996.1,XM_023197228	1	0.963403	31	79	1	648	Family	0
Theropithecus gelada	Gelada	Placental	>ENSTGEP00000012933,XP_025235389.1,XP_025235390.1,XM_025379604,XM_025379605	1	0.976024	31	79	1	648	Family	0
Sousa chinensis	Indo-Pacific humpback dolphin	Placental	TEA41230.1	1	0.987208	31	79	10	639	Family	0
Lagenorhynchus obliquidens	Pacific white-sided dolphin	Placental	XP_026981749.1,XP_026981754.1,XP_026981758.1,XP_026981752.1,XP_026981751.1,XP_026981750.1,XM_027125957,XM_027125953,XM_027125951,XM_027125950,XM_027125949,XM_027125948	1	0.987208	31	79	1	639	Family	0
Pantholops hodgsonii	Chiru	Placental	XP_005956247.1,XM_005956185	1	0.99416	31	79	1	639	Family	0
Neomonachus schauinslandi	Hawaiian monk seal	Placental	XP_021535707.1,XM_021680032	1	0.987208	31	79	10	646	Family	0
Lynx pardinus	Iberian lynx	Placental	VFV18725.1	1	0.987208	31	79	1	646	Family	0
Puma concolor	Puma	Placental	XP_025779173.1,XM_025923388	1	0.987208	31	79	1	622	Family	0
Grammomys surdaster	Thicket rat	Placental	XP_028633665.1,XM_028777832	1	0.973479	31	79	1	646	Family	0
Enhydra lutris kenyoni	Sea otter	Placental	XP_022356817.1,XM_022501109	1	0.987208	31	79	33	453	Family	0
Neotoma lepida	Desert woodrat	Placental	OBS59843.1	1	0.789557	31	79	11	544	Family	0
Terrapene carolina triunguis	Three-toed box turtle	Turtles,tortoises	XP_026514159.1,XM_026658374	1	0.983591	31	79	99	428	Family	0
Paroedura picta	Ocelot gecko	Squamata	GCF55667.1	1	0.965346	31	79	1	441	Family	1
Oncorhynchus mykiss	Rainbow trout	Bony fish	XP_021437343.1,XM_021581668	1	0.810471	31	79	256	441	Family	0
Oncorhynchus tshawytscha	Chinook salmon	Bony fish	XP_024299114.1,XM_024443346	0.967742	0.75768	31	79	256	428	Family	0
Anolis carolinensis	Anole lizard	Squamata	>ENSACAP00000011361,XP_008121623.1,XP_008121622.1,XP_008121624.1,XM_008123417,XM_008123416,XM_008123415	0.967742	0.920183	31	79	69	431	Order	1
Cebus capucinus imitator	Capuchin	Placental	XP_017389097.1,XM_017533608	1	0.925461	31	79	1	648	Order	1
Aotus nancymaae	Mas night monkey	Placental	>ENSANAP00000024906,XP_012330152.1,XP_012330150.1,XP_012330158.1,XP_012330157.1,XP_012330156.1,XP_012330154.1,XP_012330153.1,XP_012330151.1,XM_012474730,XM_012474731,XM_012474729,XM_012474735,XM_012474733,XM_012474728,XM_012474727,XM_012474734	1	0.976024	31	79	1	648	Order	0
Saimiri boliviensis boliviensis	Bolivian squirrel monkey	Placental	>ENSSBOP00000028848,XP_003934238.1,XP_010343032.1,XP_003934239.1,XM_010344730,XM_003934189,XM_003934190	1	0.976024	31	79	1	648	Order	0
Callithrix jacchus	Marmoset	Placental	>ENSCJAP00000028303,XP_017821913.1,XP_017821906.1,XP_017821904.1,XP_017821903.1,XP_008980908.1,XP_017821910.1,XP_008980918.1,XP_017821915.1,XP_017821912.1,XP_008980923.1,XM_017966423,XM_017966417,XM_017966421,XM_017966414,XM_017966424,XM_017966426,XM_008982675,XM_017966415,XM_008982670,XM_008982660	1	0.976024	31	79	1	648	Order	0
Paramormyrops kingsleyae	Mormyrid	Bony fish	XP_023653433.1,XP_023653430.1,XP_023653432.1,XM_023797662,XM_023797665,XM_023797664	0.967742	0.828866	31	79	196	446	Order	1
Canis lupus familiaris	Dog	Placental	>ENSCAFP00000021379,XP_022275356.1,XP_005621108.1,XP_022275355.1,XP_013969694.1,XP_022275357.1,XP_022275354.1,XP_022275353.1,XP_022275352.1,XP_013969696.1,XP_013969695.1,XM_014114221,XM_022419646,XM_022419649,XM_022419647,XM_014114219,XM_022419644,XM_022419645,XM_022419648,XM_014114220,XM_005621051	1	0.99416	31	79	1	646	Order	2
Vulpes vulpes	Red fox	Placental	>ENSVVUP00000032254,XP_025875278.1,XP_025875274.1,XP_025875277.1,XP_025875276.1,XP_025875275.1,XM_026019493,XM_026019490,XM_026019489,XM_026019491,XM_026019492	1	0.99416	31	79	1	646	Order	2
Gopherus agassizii	Agassizs desert tortoise	Turtles,tortoises	>ENSGAGP00000022654	1	0.983591	31	79	16	428	Order	0
Chelonoidis abingdonii	Abingdon island giant tortoise	Turtles,tortoises	>ENSCABP00000030921	1	0.981213	30	69	153	386	Order	0
Prolemur simus	Greater bamboo lemur	Placental	>ENSPSMP00000002004	1	0.9767	31	79	1	646	Order	0
Vombatus ursinus	Common wombat	Marsupial	>ENSVURP00010000305,XP_027700010.1,XP_027699977.1,XP_027700020.1,XP_027700000.1,XP_027699991.1,XP_027699984.1,XM_027844219,XM_027844190,XM_027844176,XM_027844199,XM_027844183,XM_027844209	1	0.982134	31	79	1	632	Order	1
Monodon monoceros	Narwhal	Placental	XP_029078155.1,XP_029078161.1,XP_029078160.1,XP_029078159.1,XP_029078158.1,XP_029078156.1,XM_029222326,XM_029222325,XM_029222327,XM_029222328,XM_029222323,XM_029222322	1	0.987208	31	79	1	639	Order	0
Delphinapterus leucas	Beluga whale	Placental	XP_022443588.1,XM_022587880	1	0.987208	31	79	1	639	Order	0
Neophocaena asiaeorientalis asiaeorientalis	Yangtze finless porpoise	Placental	XP_024601189.1,XP_024601190.1,XM_024745422,XM_024745421	1	0.987208	31	79	2	646	Order	0
Desmodus rotundus	Common vampire bat	Placental	XP_024427379.1,XM_024571611	1	0.972048	31	79	1	641	Order	0
Callorhinus ursinus	Northern fur seal	Placental	XP_025720391.1,XP_025720386.1,XP_025720389.1,XP_025720388.1,XP_025720387.1,XM_025864604,XM_025864601,XM_025864603,XM_025864606,XM_025864602	1	0.987208	31	79	1	646	Order	0
Eumetopias jubatus	Steller sea lion	Placental	XP_027965729.1,XP_027965728.1,XM_028109927,XM_028109928	1	0.987208	31	79	1	646	Order	0
Hipposideros armiger	Great roundleaf bat	Placental	XP_019485489.1,XM_019629944	1	0.9767	31	79	1	641	Order	0
Zalophus californianus	California sea lion	Placental	XP_027468282.1,XP_027468286.1,XP_027468285.1,XP_027468284.1,XM_027612481,XM_027612483,XM_027612484,XM_027612485	1	0.987208	31	79	1	646	Order	0
Cavia porcellus	Domestic guinea pig	Placental	XP_013008146.1,XM_013152692	1	0.961951	31	79	1	631	Order	0
Phyllostomus discolor	Pale spear-nosed bat	Placental	XP_028361828.1,XP_028361839.1,XM_028506027,XM_028506038	1	0.972048	31	79	1	641	Order	0
Eschrichtius robustus	Grey whale	Placental	MBV94899.1	1	0.987208	31	79	247	453	Order	0
Podarcis muralis	Common wall lizard	Squamata	XP_028560749.1,XM_028704916	0.967742	0.936757	31	79	215	442	Order	0
Platysternon megacephalum	Big-headed turtle	Turtles,tortoises	TFJ98473.1	1	0.811017	31	79	252	428	Order	0
Denticeps clupeoides	Denticle herring	Bony fish	XP_028836395.1	0.9375	0.825352	16	43	315	416	Order	0
Canis lupus dingo	Dingo	Placental	XP_025281824.1,XP_025281823.1,XP_025281822.1,XP_025281821.1,XP_025281820.1,XP_025281819.1,XP_025281817.1,XP_025281816.1,XP_025281815.1,XM_025426036,XM_025426035,XM_025426037,XM_025426030,XM_025426031,XM_025426032,XM_025426039,XM_025426034,XM_025426038	1	0.99416	31	79	1	646	Order	2
Procavia capensis	Hyrax	Placental	>ENSPCAP00000001501	1	0.986893	18	54	11	645	Clade	0
Manis javanica	Malayan pangolin	Placental	XP_017499701.1,XP_017499704.1,XP_017499703.1,XP_017499702.1,XM_017644214,XM_017644215,XM_017644212,XM_017644213	1	0.987208	31	79	1	646	Clade	0
Odocoileus virginianus texanus	White-tailed deer	Placental	XP_020765193.1,XP_020765190.1,XP_020765192.1,XP_020765191.1,XM_020909533,XM_020909534,XM_020909532,XM_020909531	1	0.987208	31	79	1	645	Clade	0
Cervus elaphus hippelaphus	Central european red deer	Placental	OWK11297.1	1	0.987208	31	79	10	639	Clade	0
Elephantulus edwardii	Cape elephant shrew	Placental	XP_006896644.1,XM_006896582	1	0.967501	31	79	2	620	Clade	0
Rhinatrema bivittatum	Two-lined caecilian	Amphibians	XP_029436419.1,XP_029436420.1,XP_029436421.1,XP_029436423.1,XP_029436425.1,XM_029580559,XM_029580560,XM_029580561,XM_029580563,XM_029580565	1	0.970731	31	79	2	646	Phylum	0
Xenopus laevis	African clawed frog	Amphibians	XP_018109392.1,XM_018253903	0.935484	0.822378	31	79	251	428	Phylum	3
Xenopus tropicalis	Tropical clawed frog	Amphibians	OCA15350.1	0.935484	0.807022	31	74	251	417	Phylum	3
