# Supplementary material for: ZCWPW1 is recruited to recombination hotspots by PRDM9 and is essential for meiotic double strand break repair
Source: eLife. 2020 Aug 3;9:e53392. doi: 10.7554/eLife.53392 (PMC7494361; doi:10.7554/eLife.53392)
Supplement: Figure 1—source data 2. — Notes on Table columns: fThe taxonomic relationship of this species to the closest species possessing a copy of ZWPW1 we annotated. gData are reproduced from Baker et al., 2017, so columns A, B, C are taken directly from Supplementary File 1 in that paper. hIn Supplementary File 1 (Baker et al., 2017) the identified domains of PRDM9 are given in each observed orthologue. We identified a species-based ‘maximum’ domain set by recording which of three N-terminal domains (SET, KRAB, SSXRD) were present in that species (in one or more orthologues of PRDM9 identified in that species). iIn Supplementary File 1 (Baker et al., 2017), the presence/absence of each of three catalytic tyrosine residues (Y276,341,357) of the human PRDM9 SET domain is given for each PRDM9 ortholog, and we summed these to make a total (0–3). We constructed a species-based maximum value for this sum ‘Y276,341,357.Max.sum’ by taking the maximum value of this sum observed across all PRDM9 orthologues identified in a given species. [file elife-53392-fig1-data2.xlsx]

## Sheet: Fig1_Source_Data_2
PRDM9 orthologues (Baker et al., 2017)
Species nameg	Data.sourcesg	Major.cladeg	Maximum.Domain.architectureh	Y276,341,357.Max.sumi	Closest_ZCWPW1f	Notes on Table columns
Haplochromis burtoni	RefSeq	Bony fish	SET	0	Class	fThe taxonomic relationship of this species to the closest species possessing a copy of ZWPW1 we annotated
Maylandia zebra	RefSeq	Bony fish	SET	0	Class	gData are reproduced from Baker et al. (2017), so columns A, B, C are taken directly from Supplementary File 1 in that paper.
Neolamprologus brichardi	RefSeq	Bony fish	SET	0	Class	hIn Supplementary File 1 (Baker et al. 2017) the identified domains of PRDM9 are given in each observed orthologue. We identified a species-based "maximum" domain set by recording which of three N-terminal domains (SET, KRAB, SSXRD) were present in that species (in one or more orthologues of PRDM9 identified in that species).
Oreochromis niloticus	RefSeq	Bony fish	SET	0	Class	iIn Supplementary File 1 (Baker et al. 2017) the presence/absence of each of three catalytic tyrosine residues (Y276,341,357) of the human PRDM9 SET domain is given for each PRDM9 ortholog, and we summed these to make a total (0-3). We constructed a species-based maximum value for this sum "Y276,341,357.Max.sum" by taking the maximum value of this sum observed across all PRDM9 orthologues identif…
Pundamilia nyererei	RefSeq	Bony fish	SET	0	Class
Cynoglossus semilaevis	RefSeq	Bony fish	SET	1	Class
Danio rerio	RefSeq	Bony fish	SET	1	Class
Fundulus heteroclitus	RefSeq	Bony fish	SET	1	Class
Nothobranchius furzeri	RefSeq	Bony fish	SET	1	Class
Poecilia formosa	RefSeq	Bony fish	SET	1	Class
Poecilia latipinna	RefSeq	Bony fish	SET	1	Class
Poecilia mexicana	RefSeq	Bony fish	SET	1	Class
Poecilia reticulata	RefSeq	Bony fish	SET	1	Class
Takifugu rubripes	RefSeq	Bony fish	SET	1	Class
Xiphophorus maculatus	RefSeq	Bony fish	SET	1	Class
Cyprinus carpio	WGS	Bony fish	SET	1	Class
Sinocyclocheilus anshuiensis	WGS	Bony fish	SET	1	Class
Sinocyclocheilus grahami	WGS	Bony fish	SET	1	Class
Sinocyclocheilus rhinocerous	WGS	Bony fish	SET	1	Class
Squalius pyrenaicus	WGS	Bony fish	SET	1	Class
Fukomys damarensis	RefSeq	Placental	KRAB-SSXRD-SET	2	Species
Macaca nemestrina	RefSeq	Placental	KRAB-SSXRD-SET	2	Species
Miniopterus natalensis	RefSeq	Placental	KRAB-SSXRD-SET	2	Species
Pan paniscus	RefSeq	Placental	KRAB-SSXRD-SET	2	Species
Anguilla anguilla	WGS	Bony fish	KRAB-SSXRD-SET	2	Class
Larimichthys crocea	RefSeq	Bony fish	SET	2	Class
Notothenia coriiceps	RefSeq	Bony fish	SET	2	Class
Oryzias latipes	RefSeq	Bony fish	SET	2	Class
Osteoglossum bicirrhosum	transcript	Bony fish	SET	2	Order
Scleropages formosus	WGS	Bony fish	SET	2	Order
Vipera berus	WGS	Squamata	KRAB-SET	3	Family
Callorhinchus milii	WGS	Cartilaginous fish	KRAB-SET	3	Class
Chelonia mydas	RefSeq	Turtle	KRAB-SSXRD-SET	3	Species
Chrysemys picta bellii	RefSeq	Turtle	KRAB-SSXRD-SET	3	Species
Pelodiscus sinensis	RefSeq	Turtle	KRAB-SSXRD-SET	3	Species
Acinonyx jubatus	RefSeq	Placental	KRAB-SSXRD-SET	3	Species
Ailuropoda melanoleuca	RefSeq	Placental	KRAB-SSXRD-SET	3	Species
Balaenoptera acutorostrata scammoni	RefSeq	Placental	KRAB-SSXRD-SET	3	Species
Bos taurus	RefSeq	Placental	KRAB-SSXRD-SET	3	Species
Bubalus bubalis	RefSeq	Placental	KRAB-SSXRD-SET	3	Species
Camelus bactrianus	RefSeq	Placental	KRAB-SSXRD-SET	3	Species
Camelus dromedarius	RefSeq	Placental	KRAB-SSXRD-SET	3	Species
Camelus ferus	RefSeq	Placental	KRAB-SSXRD-SET	3	Species
Carlito syrichta	RefSeq	Placental	KRAB-SSXRD-SET	3	Species
Ceratotherium simum simum	RefSeq	Placental	KRAB-SSXRD-SET	3	Species
Cercocebus atys	RefSeq	Placental	KRAB-SSXRD-SET	3	Species
Chinchilla lanigera	RefSeq	Placental	KRAB-SSXRD-SET	3	Species
Chlorocebus sabaeus	RefSeq	Placental	KRAB-SSXRD-SET	3	Species
Chrysochloris asiatica	RefSeq	Placental	KRAB-SSXRD-SET	3	Species
Condylura cristata	RefSeq	Placental	KRAB-SSXRD-SET	3	Species
Cricetulus griseus	RefSeq	Placental	KRAB-SSXRD-SET	3	Species
Dasypus novemcinctus	RefSeq	Placental	KRAB-SSXRD-SET	3	Species
Echinops telfairi	RefSeq	Placental	KRAB-SSXRD-SET	3	Species
Equus przewalskii	RefSeq	Placental	KRAB-SSXRD-SET	3	Species
Erinaceus europaeus	RefSeq	Placental	KRAB-SSXRD-SET	3	Species
Felis catus	RefSeq	Placental	KRAB-SSXRD-SET	3	Species
Galeopterus variegatus	RefSeq	Placental	KRAB-SSXRD-SET	3	Species
Gorilla gorilla gorilla	RefSeq	Placental	KRAB-SSXRD-SET	3	Species
Heterocephalus glaber	RefSeq	Placental	KRAB-SSXRD-SET	3	Species
Homo sapiens	RefSeq	Placental	KRAB-SSXRD-SET	3	Species
Ictidomys tridecemlineatus	RefSeq	Placental	KRAB-SSXRD-SET	3	Species
Jaculus jaculus	RefSeq	Placental	KRAB-SSXRD-SET	3	Species
Lipotes vexillifer	RefSeq	Placental	KRAB-SSXRD-SET	3	Species
Loxodonta africana	RefSeq	Placental	KRAB-SSXRD-SET	3	Species
Macaca fascicularis	RefSeq	Placental	KRAB-SSXRD-SET	3	Species
Macaca mulatta	RefSeq	Placental	KRAB-SSXRD-SET	3	Species
Mandrillus leucophaeus	RefSeq	Placental	KRAB-SSXRD-SET	3	Species
Marmota marmota marmota	RefSeq	Placental	KRAB-SSXRD-SET	3	Species
Mesocricetus auratus	RefSeq	Placental	KRAB-SSXRD-SET	3	Species
Microtus ochrogaster	RefSeq	Placental	KRAB-SSXRD-SET	3	Species
Mus musculus	RefSeq	Placental	KRAB-SSXRD-SET	3	Species
Mustela putorius furo	RefSeq	Placental	KRAB-SSXRD-SET	3	Species
Nannospalax galili	RefSeq	Placental	KRAB-SSXRD-SET	3	Species
Ochotona princeps	RefSeq	Placental	KRAB-SSXRD-SET	3	Species
Octodon degus	RefSeq	Placental	KRAB-SSXRD-SET	3	Species
Odobenus rosmarus divergens	RefSeq	Placental	KRAB-SSXRD-SET	3	Species
Orcinus orca	RefSeq	Placental	KRAB-SSXRD-SET	3	Species
Oryctolagus cuniculus	RefSeq	Placental	KRAB-SSXRD-SET	3	Species
Otolemur garnettii	RefSeq	Placental	KRAB-SSXRD-SET	3	Species
Ovis aries	RefSeq	Placental	KRAB-SSXRD-SET	3	Species
Ovis aries musimon	RefSeq	Placental	KRAB-SSXRD-SET	3	Species
Panthera tigris altaica	RefSeq	Placental	KRAB-SSXRD-SET	3	Species
Papio anubis	RefSeq	Placental	KRAB-SSXRD-SET	3	Species
Peromyscus maniculatus bairdii	RefSeq	Placental	KRAB-SSXRD-SET	3	Species
Physeter catodon	RefSeq	Placental	KRAB-SSXRD-SET	3	Species
Pongo abelii	RefSeq	Placental	KRAB-SSXRD-SET	3	Species
Propithecus coquereli	RefSeq	Placental	KRAB-SSXRD-SET	3	Species
Pteropus alecto	RefSeq	Placental	KRAB-SSXRD-SET	3	Species
Pteropus vampyrus	RefSeq	Placental	KRAB-SSXRD-SET	3	Species
Rattus norvegicus	RefSeq	Placental	KRAB-SSXRD-SET	3	Species
Rhinopithecus roxellana	RefSeq	Placental	KRAB-SSXRD-SET	3	Species
Rousettus aegyptiacus	RefSeq	Placental	KRAB-SSXRD-SET	3	Species
Sorex araneus	RefSeq	Placental	KRAB-SSXRD-SET	3	Species
Trichechus manatus latirostris	RefSeq	Placental	KRAB-SSXRD-SET	3	Species
Tupaia chinensis	RefSeq	Placental	KRAB-SSXRD-SET	3	Species
Tursiops truncatus	RefSeq	Placental	KRAB-SSXRD-SET	3	Species
Ursus maritimus	RefSeq	Placental	KRAB-SSXRD-SET	3	Species
Vicugna pacos	RefSeq	Placental	KRAB-SSXRD-SET	3	Species
Pan troglodytes	RefSeq	Placental	KRAB-SSXRD-SET	3	Species
Dipodomys ordii	RefSeq	Placental	KRAB-SSXRD-SET	3	Order
Lepisosteus oculatus	RefSeq,RefSeq+transcript	Bony fish	KRAB-SSXRD-SET	3	Species
Salmo salar	RefSeq,RefSeq+transcript,RefSeq+WGS	Bony fish	KRAB-SSXRD-SET	3	Species
Bison bison bison	RefSeq,RefSeq+WGS	Placental	KRAB-SSXRD-SET	3	Species
Esox lucius	RefSeq,WGS	Bony fish	KRAB-SSXRD-SET	3	Species
Latimeria chalumnae	RefSeq+WGS	Coelacanth	KRAB-SSXRD-SET	3	Species
Protobothrops mucrosquamatus	RefSeq+WGS	Squamata	KRAB-SSXRD-SET	3	Species
Microcebus murinus	RefSeq+WGS	Placental	KRAB-SSXRD-SET	3	Species
Sus scrofa	RefSeq+WGS	Placental	KRAB-SSXRD-SET	3	Species
Bos mutus	RefSeq+WGS,RefSeq	Placental	KRAB-SSXRD-SET	3	Species
Phascolarctos cinereus	transcript	Marsupial	KRAB-SSXRD-SET	3	Species
Salmo trutta	transcript	Bony fish	KRAB-SSXRD-SET	3	Genus
Latimeria menadoensis	transcript	Coelacanth	KRAB-SSXRD-SET	3	Genus
Brevoortia tyrannus	transcript	Bony fish	KRAB-SSXRD-SET	3	Order
Petromyzon marinus	WGS	Jawless fish	KRAB-SSXRD-SET	3	Species
Rhincodon Typus	WGS	Cartilaginous fish	KRAB-SSXRD-SET	3	Species
Ophiophagus hannah	WGS	Squamata	KRAB-SSXRD-SET	3	Species
Pogona vitticeps	WGS	Squamata	KRAB-SSXRD-SET	3	Species
Python bivittatus	WGS	Squamata	KRAB-SSXRD-SET	3	Species
Thamnophis sirtalis	WGS	Squamata	KRAB-SSXRD-SET	3	Species
Macropus eugenii	WGS	Marsupial	KRAB-SSXRD-SET	3	Species
Crotalus horridus	WGS	Squamata	KRAB-SSXRD-SET	3	Family
Crotalus mitchellii	WGS	Squamata	KRAB-SSXRD-SET	3	Family
Deinagkistrodon acutus	WGS	Squamata	KRAB-SSXRD-SET	3	Family
Gekko japonicus	WGS	Squamata	KRAB-SSXRD-SET	3	Family
Pantherophis guttatus	WGS	Squamata	KRAB-SSXRD-SET	3	Family
Apalone spinifera	WGS	Turtle	KRAB-SSXRD-SET	3	Family
Boa constrictor	WGS	Squamata	KRAB-SSXRD-SET	3	Order
Eublepharis macularius	WGS	Squamata	KRAB-SSXRD-SET	3	Order
Ophisaurus gracilis	WGS	Squamata	KRAB-SSXRD-SET	3	Order
Monodelphis domestica	WGS	Marsupial	KRAB-SSXRD-SET	3	Clade
Anguilla rostrata	WGS	Bony fish	KRAB-SSXRD-SET	3	Class
Astyanax mexicanus	RefSeq	Bony fish	SET	3	Species
Clupea harengus	RefSeq	Bony fish	SET	3	Order
Ictalurus punctatus	WGS	Bony fish	SET	3	Species
Pygocentrus nattereri	WGS	Bony fish	SET	3	Species
Gadus morhua	WGS	Bony fish	SET	3	Class
Sarcophilus harrisii	RefSeq	Marsupial	SSXRD-SET	3	Species
Colobus angolensis palliatus	RefSeq	Placental	SSXRD-SET	3	Species
Eptesicus fuscus	RefSeq	Placental	SSXRD-SET	3	Species
Equus caballus	RefSeq	Placental	SSXRD-SET	3	Species
Myotis brandtii	RefSeq	Placental	SSXRD-SET	3	Species
Myotis davidii	RefSeq	Placental	SSXRD-SET	3	Species
Myotis lucifugus	RefSeq	Placental	SSXRD-SET	3	Species
Nomascus leucogenys	RefSeq	Placental	SSXRD-SET	3	Species
Leptonychotes weddellii	RefSeq	Placental	SSXRD-SET	3	Family
Orycteropus afer afer	RefSeq	Placental	SSXRD-SET	3	Clade
Ornithorhynchus anatinus	WGS	Monotremata	SSXRD-SET	3	Species
Lethenteron camtschaticum	WGS	Jawless fish	SSXRD-SET	3	Family
Anguilla japonica	WGS	Bony fish	SSXRD-SET	3	Class
