# Supplementary material for: ZCWPW1 is recruited to recombination hotspots by PRDM9 and is essential for meiotic double strand break repair
Source: eLife. 2020 Aug 3;9:e53392. doi: 10.7554/eLife.53392 (PMC7494361; doi:10.7554/eLife.53392)
Supplement: Figure 2—source data 1. — Only chromosomes clearly identifiable were included in the analysis. X and Y were excluded as they are covered in ZCWPW1 signal (which strong labels the XY body). Stages: P, Pachytene; D, Diplotene. Tel: Telomeric probe. Cen: Centromeric probe. [file elife-53392-fig2-data1.xlsx]

## Sheet: Fig_2_Source_Data_1
Immuno-FISH analysis of ZCWPW1 foci localisation at the synaptonemal complex ends in WT testis (mid-Pachytene to Late Diplotene cells)
X and Y were excluded, as they are covered in ZCWPW1 signal (which strong labels the XY body)							Tel	Telomeric probe			Stages	P: Pachytene
Only chromosomes clearly identifiable were included in the analysis							Cen	Centromeric probe				D: Diplotene
Number of chromosomes per cells showing ZCWPW1 foci										% of chromosomes per cells showing ZCWPW1 foci
Image	Stage	at both ends	at Cen end	at Tel end	not labelled	Total			Stage	at both ends	at Cen end	at Tel end	not labelled	Total
1	Mid-P	10	5			15			Mid-P	0.419786	0.299465	0.0695187	0.21123	1
2	Mid-P	6	7	2		15			Late P	0.554348	0.25	0.076087	0.119565	1
3	Mid-P	6	8			14			Early D	0.627907	0.232558	0.0465116	0.0930233	1
4	Mid-P	8	3	1	2	14			Mid-D	0.448276	0.413793	0.0344828	0.103448	1
4	Mid-P	6	5	1	2	14			Late D	0.422222	0.377778	0.111111	0.0888889	1
4	Mid-P	13	4			17
4	Mid-P	7	4	2		13				95% Confidence Intervals of the Proportion of chromosomes per cell showing ZCWPW1 foci
4	Mid-P	3	7	2	3	15				at both ends		at Cen end		at Tel end		not labelled
4	Mid-P	9	3	1	1	14			Stage	Lower	Upper	Lower	Upper	Lower	Upper	Lower	Upper
5	Mid-P	7	4		1	12			Mid-P	0.370833	0.470371	0.255276	0.347732	0.0478798	0.0999109	0.172904	0.255428
5	Mid-P	8	4		2	14			Late P	0.452637	0.651702	0.172753	0.347288	0.0373436	0.148812	0.0680913	0.201536
14	Mid-P	4	4	1	7	16			Early D	0.478598	0.756237	0.131537	0.377445	0.0128493	0.154555	0.0367716	0.216027
s7	Mid-P	7	5	1	3	16			Mid-D	0.327499	0.575479	0.29628	0.542016	0.00950793	0.117291	0.0482814	0.207881
s7	Mid-P	11	4		1	16			Late D	0.289687	0.566992	0.251081	0.523701	0.0484047	0.234991	0.0351111	0.207336
s7	Mid-P	6	3			9
15	Mid-P	4	4	1	5	14
17	Mid-P	3	6	1	5	15
19	Mid-P	3	1	2	6	12
20	Mid-P	8	4	2	3	17
21	Mid-P	7	5	1	6	19
22	Mid-P	7	4	2	5	18
23	Mid-P	2	5	3	8	18
25	Mid-P	3	4	2	6	15
25	Mid-P	2	2		10	14
27	Mid-P	7	7	1	3	18
s7	Late P	6	5	1	3	15
S8	Late P	7	4	2	2	15
S18	Late P	6	6	2	4	18
13	Late P	10	5		1	16
1	Late P	9	1	2		12
9	Late P	13	2		1	16
3	Early D	7	8	1	2	18
6	Early D	11	1	1		13
12	Early D	9	1		2	12
s7	Mid-D	5	8	1		14
15	Mid-D	2	2	1	5	10
19	Mid-D	9	5		1	15
3	Mid-D	9	2			11
5	Mid-D	1	7			8
5	Late D	3	5	1		9
4	Late D	8	4		1	13
s7	late D	7	4		2	13
23	Late D	1	4	4	1	10
			Stage	labelled both ends	Labelled cen end	Labelled distal tel	Not labelled
			P	0.67	0.33	0	0
			P	0.4	0.466667	0.133333	0
			P	0.428571	0.571429	0	0
			P	0.571429	0.214286	0.0714286	0.142857
			P	0.428571	0.357143	0.0714286	0.142857
			P	0.764706	0.235294	0	0
			P	0.538462	0.307692	0.153846	0
			P	0.2	0.466667	0.133333	0.2
			P	0.642857	0.214286	0.0714286	0.0714286
			P	0.583333	0.333333	0	0.0833333
			P	0.571429	0.285714	0	0.142857
			P	0.25	0.25	0.0625	0.4375
			P	0.4375	0.3125	0.0625	0.1875
			P	0.6875	0.25	0	0.0625
			P	0.666667	0.333333	0	0
			P	0.285714	0.285714	0.0714286	0.357143
			P	0.2	0.4	0.0666667	0.333333
			P	0.25	0.0833333	0.166667	0.5
			P	0.470588	0.235294	0.117647	0.176471
			P	0.368421	0.263158	0.0526316	0.315789
			P	0.388889	0.222222	0.111111	0.277778
			P	0.111111	0.277778	0.166667	0.444444
			P	0.2	0.266667	0.133333	0.4
			P	0.142857	0.142857	0	0.714286
			P	0.388889	0.388889	0.0555556	0.166667
			Late P	0.4	0.333333	0.0666667	0.2
			Late P	0.466667	0.266667	0.133333	0.133333
			Late P	0.333333	0.333333	0.111111	0.222222
			Late P	0.625	0.3125	0	0.0625
			Late P	0.75	0.0833333	0.166667	0
			Late P	0.8125	0.125	0	0.0625
			Early D	0.388889	0.444444	0.0555556	0.111111
			Early D	0.846154	0.0769231	0.0769231	0
			Early D	0.75	0.0833333	0	0.166667
			D	0.357143	0.571429	0.0714286	0
			D	0.2	0.2	0.1	0.5
			D	0.6	0.333333	0	0.0666667
			D	0.818182	0.181818	0	0
			D	0.125	0.875	0	0
			Late D	0.333333	0.555556	0.111111	0
			Late D	0.615385	0.307692	0	0.0769231
			late D	0.538462	0.307692	0	0.153846
			Late D	0.1	0.4	0.4	0.1
