# Supplementary material for: ZCWPW1 is recruited to recombination hotspots by PRDM9 and is essential for meiotic double strand break repair
Source: eLife. 2020 Aug 3;9:e53392. doi: 10.7554/eLife.53392 (PMC7494361; doi:10.7554/eLife.53392)
Supplement: Figure 3—figure supplement 2—source data 1. — The number of normal pachytene cells showing full synapsis of all autosomes and sex chromosomes (expressed as ‘% synapsis’ of all cells analysed) was determined by immunostaining of testis chromosome spreads against SYCP3, HORMAD2 and γ-H2AX (see images in Figure 3—figure supplement 2). The nature of the defects observed in cells with asynapsis was recorded as either ‘tangled’ (when chromosomes pair with the wrong partner, forming branched tangled structures); ‘multibodies’ strongly positive for HORMAD2 (when asynapsed chromosomes form multiple XY-like bodies which end up merging with each other, and with the XY body); or ‘split XY’ (when the X and Y sex chromosomes are found away from each other in different areas of the cell nucleus). Mouse ID is consistent across Figure 3—source data 1 and 2 and Figure 4—source data 1. [file elife-53392-fig3-figsupp2-data1.xlsx]

## Sheet: Fig_3_Source_Data_3
Impaired synapsis in Zcwpw1-/- males
Mouse	Genotype	Type of synaptic error			Normal cells	Cells analysed	% synapsis
		Tangled	Multibody	Split XY
1	+/+	0	1	0	50	51	98
2	+/+	1	1	1	49	52	94
3	+/+	0	3	0	53	56	94.6
4	Zcwpw1-/-	20	31	1	1	53	1.9
5	Zcwpw1-/-	1	49	0	1	51	2
6	Zcwpw1-/-	17	34	0	0	51	0
11	Prdm9-/-	31	21	0	3	55	5.4
13	Prdm9-/-	31	15	0	3	49	6
The number of normal pachytene cells showing full synapsis of all autosomes and sex chromosomes (expressed as “% synapsis” of all cells analysed) was determined by immunostaining of testis chromosome spreads against SYCP3, HORMAD2 and γ-H2AX (see images in Figure 3-figure supplement 2). The nature of the defects observed in cells with asynapsis was recorded as either “tangled” (when chromosomes p…
