# Supplementary material for: ZCWPW1 is recruited to recombination hotspots by PRDM9 and is essential for meiotic double strand break repair
Source: eLife. 2020 Aug 3;9:e53392. doi: 10.7554/eLife.53392 (PMC7494361; doi:10.7554/eLife.53392)
Supplement: Figure 3—source data 1. — Fertility was assessed in mice ranging from 8 to 12 weeks of age through measurement of paired testes weight and sperm count. Mouse ID is consistent across Figure 3—source data 2 and Figure 4—source data 1. [file elife-53392-fig3-data1.xlsx]

## Sheet: Fig_3_Source_Data_1
Fertility measures in WT (+/+), Zcwpw1-/- and Prdm9-/- males
Mouse	Genotype	Age at death (weeks, days)	Total body weight (g)	Lean body weight (g)	Paired testes weight (mg)	Paired testes weight / g of total weight	Paired testes weight / g of lean weight	Sperm count in millions / paired epididymides (average of 4 counts)
1	+/+	10w 1d	26.2	19.8	179.2	6.84	9.05	20.45
2	+/+	10w 1d	27.4	20.42	183.8	6.71	9	32.5
3	+/+	9w 3d	28.6	22.56	190.4	6.66	8.44	25.95
4	Zcwpw1-/-	9w 5d	26.7	20.66	49.8	1.87	2.41	0
5	Zcwpw1-/-	9w 6d	25.8	19.7	35	1.36	1.78	0
6	Zcwpw1-/-	8w 5d	27.9	21.98	56.9	2.04	2.59	0
7	Zcwpw1-/-	9w 5d	25.1	18.89	39.4	1.57	2.09	0
8	Zcwpw1-/-	9w 5d	23.2	19.62	50.9	2.19	2.59	0
9	Prdm9-/-	12w 4d	28.3	21.77	50.3	1.78	2.31	0
10	Prdm9 -/-	12w 5d	27.9	22.36	49.2	1.76	2.2	0
Fertility was assessed in mice ranging from 8 to 12 weeks of age through measurement of paired testes weight and sperm count. Mouse ID is consistent across Figure 3-source data 1,3 and Figure 4-source data 1.
Mouse numbers are consistent across
