# Supplementary material for: ZCWPW1 is recruited to recombination hotspots by PRDM9 and is essential for meiotic double strand break repair
Source: eLife. 2020 Aug 3;9:e53392. doi: 10.7554/eLife.53392 (PMC7494361; doi:10.7554/eLife.53392)
Supplement: Figure 3—source data 2. — All females were crossed with a WT male. N/A, not applicable; TLL, total litter loss; *assigned a value of 0 as the number of pups born in the total counts. [file elife-53392-fig3-data2.xlsx]

## Sheet: Fig_3_Source_Data_2
Breeding performance of Zcwpw1-/- females
Mouse	Genotype	Litter	Age at time of litter / death (months)	Pups born	Cumulative pups born	Frequency (time since previous litter in weeks & days)	Average number of pups/litter over breeding life
1	Zcwpw1-/-	1	3	9	9	N/A	4.1
1	Zcwpw1-/-	2	4	7	16	3w 5d
1	Zcwpw1-/-	3	5	4	20	3w 2d
1	Zcwpw1-/-	4	5.75	4	24	3w 1d
1	Zcwpw1-/-	5	6.5	TLL*	24	3w 1d
1	Zcwpw1-/-	6	7.5	3	27	4w 0d
1	Zcwpw1-/-	7	8.25	2	29	3w 2d
2	Zcwpw1-/-	1	2.75	7	7	N/A	7
2	Zcwpw1-/-	2	3.5	5	12	3w 3d
2	Zcwpw1-/-	3	6	12	24	9w 6d
2	Zcwpw1-/-	4	7	4	28	4w 1d
2	Zcwpw1-/-	female culled	9	N/A	28	8w 3d
All females were crossed with a WT male. N/A, not applicable; TLL, total litter loss; *assigned a value of 0 as the number of pups born in the total counts.
