# Supplementary material for: ZCWPW1 is recruited to recombination hotspots by PRDM9 and is essential for meiotic double strand break repair
Source: eLife. 2020 Aug 3;9:e53392. doi: 10.7554/eLife.53392 (PMC7494361; doi:10.7554/eLife.53392)
Supplement: Figure 4—source data 1. — Stages: L, Leptotene; Z, Zygotene; P, Pachytene. WT: wild-type. Mouse ID is consistent across Figure 3—source data 1 and 2 and Figure 4—source data 1. [file elife-53392-fig4-data1.xlsx]

## Sheet: Fig_4_Source_Data_1
Raw data for DMC1, RAD51 and RPA2 foci counts
Image	Stage	Foci count	Mouse	Genotype	Target		Stages key
11	Late L	28	5	Zcwpw1-/-	DMC1		L	Leptotene
11	Early Z	127	5	Zcwpw1-/-	DMC1		Z	Zygotene
6	Early Z	40	5	Zcwpw1-/-	DMC1		P	Pachytene
4	Early Z	125	5	Zcwpw1-/-	DMC1
13	Early Z	136	5	Zcwpw1-/-	DMC1		Genotype	Alleles
19	Early Z	69	5	Zcwpw1-/-	DMC1		WT (wild-type)	Zcwpw1+/+, Prdm9+/+
15	Early Z	88	5	Zcwpw1-/-	DMC1		Zcwpw1-/-	Zcwpw1-/-, Prdm9+/+
23	Early Z	101	5	Zcwpw1-/-	DMC1		Prdm9-/-	Zcwpw1+/+, Prdm9-/-
22	Early Z	275	5	Zcwpw1-/-	DMC1
29	Early Z	160	5	Zcwpw1-/-	DMC1		Mouse ID	Consistent across Figure 3-source data 1,3 and Figure 4-source data 1.
29	Early Z	196	5	Zcwpw1-/-	DMC1
28	Early Z	159	5	Zcwpw1-/-	DMC1
28	Early Z	161	5	Zcwpw1-/-	DMC1
26	Early Z	150	5	Zcwpw1-/-	DMC1
33	Early Z	50	5	Zcwpw1-/-	DMC1
6	Mid-Z	158	5	Zcwpw1-/-	DMC1
4	Mid-Z	207	5	Zcwpw1-/-	DMC1
4	Mid-Z	100	5	Zcwpw1-/-	DMC1
3	Mid-Z	155	5	Zcwpw1-/-	DMC1
9	Mid-Z	171	5	Zcwpw1-/-	DMC1
18	Mid-Z	95	5	Zcwpw1-/-	DMC1
16	Mid-Z	143	5	Zcwpw1-/-	DMC1
15	Mid-Z	106	5	Zcwpw1-/-	DMC1
6	Mid-Z	185	5	Zcwpw1-/-	DMC1
6	Mid-Z	130	5	Zcwpw1-/-	DMC1
6	Mid-Z	101	5	Zcwpw1-/-	DMC1
5	Mid-Z	106	5	Zcwpw1-/-	DMC1
4	Mid-Z	96	5	Zcwpw1-/-	DMC1
2	Mid-Z	290	5	Zcwpw1-/-	DMC1
2	Mid-Z	193	5	Zcwpw1-/-	DMC1
13	Mid-Z	220	5	Zcwpw1-/-	DMC1
11	Mid-Z	211	5	Zcwpw1-/-	DMC1
9	Mid-Z	152	5	Zcwpw1-/-	DMC1
18	Mid-Z	219	5	Zcwpw1-/-	DMC1
15	Mid-Z	115	5	Zcwpw1-/-	DMC1
24	Mid-Z	183	5	Zcwpw1-/-	DMC1
23	Mid-Z	137	5	Zcwpw1-/-	DMC1
23	Mid-Z	196	5	Zcwpw1-/-	DMC1
29	Mid-Z	121	5	Zcwpw1-/-	DMC1
29	Mid-Z	216	5	Zcwpw1-/-	DMC1
31	Mid-Z	200	5	Zcwpw1-/-	DMC1
50	Mid-P	93	5	Zcwpw1-/-	DMC1
50	Mid-P	85	5	Zcwpw1-/-	DMC1
50	Mid-P	105	5	Zcwpw1-/-	DMC1
49	Mid-P	132	5	Zcwpw1-/-	DMC1
48	Mid-P	82	5	Zcwpw1-/-	DMC1
47	Mid-P	125	5	Zcwpw1-/-	DMC1
47	Mid-P	108	5	Zcwpw1-/-	DMC1
46	Mid-P	27	5	Zcwpw1-/-	DMC1
45	Mid-P	96	5	Zcwpw1-/-	DMC1
45	Mid-P	43	5	Zcwpw1-/-	DMC1
45	Mid-P	70	5	Zcwpw1-/-	DMC1
44	Mid-P	200	5	Zcwpw1-/-	DMC1
44	Mid-P	55	5	Zcwpw1-/-	DMC1
43	Mid-P	98	5	Zcwpw1-/-	DMC1
43	Mid-P	113	5	Zcwpw1-/-	DMC1
43	Mid-P	58	5	Zcwpw1-/-	DMC1
42	Mid-P	40	5	Zcwpw1-/-	DMC1
42	Mid-P	15	5	Zcwpw1-/-	DMC1
42	Mid-P	48	5	Zcwpw1-/-	DMC1
42	Mid-P	18	5	Zcwpw1-/-	DMC1
41	Mid-P	36	5	Zcwpw1-/-	DMC1
41	Mid-P	11	5	Zcwpw1-/-	DMC1
41	Mid-P	21	5	Zcwpw1-/-	DMC1
40	Mid-P	111	5	Zcwpw1-/-	DMC1
39	Mid-P	165	5	Zcwpw1-/-	DMC1
38	Mid-P	138	5	Zcwpw1-/-	DMC1
37	Mid-P	138	5	Zcwpw1-/-	DMC1
36	Mid-P	46	5	Zcwpw1-/-	DMC1
35	Mid-P	51	5	Zcwpw1-/-	DMC1
34	Mid-P	85	5	Zcwpw1-/-	DMC1
33	Mid-P	77	5	Zcwpw1-/-	DMC1
32	Mid-P	112	5	Zcwpw1-/-	DMC1
31	Mid-P	109	5	Zcwpw1-/-	DMC1
28	Mid-P	120	5	Zcwpw1-/-	DMC1
28	Mid-P	156	5	Zcwpw1-/-	DMC1
27	Mid-P	83	5	Zcwpw1-/-	DMC1
27	Mid-P	69	5	Zcwpw1-/-	DMC1
26	Mid-P	106	5	Zcwpw1-/-	DMC1
26	Mid-P	32	5	Zcwpw1-/-	DMC1
25	Mid-P	103	5	Zcwpw1-/-	DMC1
24	Mid-P	122	5	Zcwpw1-/-	DMC1
23	Mid-P	35	5	Zcwpw1-/-	DMC1
23	Mid-P	66	5	Zcwpw1-/-	DMC1
23	Mid-P	66	5	Zcwpw1-/-	DMC1
22	Mid-P	54	5	Zcwpw1-/-	DMC1
22	Mid-P	41	5	Zcwpw1-/-	DMC1
21	Mid-P	84	5	Zcwpw1-/-	DMC1
20	Mid-P	83	5	Zcwpw1-/-	DMC1
19	Mid-P	166	5	Zcwpw1-/-	DMC1
18	Mid-P	69	5	Zcwpw1-/-	DMC1
18	Mid-P	108	5	Zcwpw1-/-	DMC1
5	Mid-P	73	5	Zcwpw1-/-	DMC1
4	Mid-P	163	5	Zcwpw1-/-	DMC1
4	Mid-P	42	5	Zcwpw1-/-	DMC1
3	Mid-P	133	5	Zcwpw1-/-	DMC1
2	Mid-P	89	5	Zcwpw1-/-	DMC1
2	Mid-P	78	5	Zcwpw1-/-	DMC1
2	Mid-P	48	5	Zcwpw1-/-	DMC1
2	Mid-P	65	5	Zcwpw1-/-	DMC1
1	Mid-P	80	5	Zcwpw1-/-	DMC1
13	Mid-P	40	5	Zcwpw1-/-	DMC1
13	Mid-P	127	5	Zcwpw1-/-	DMC1
13	Mid-P	41	5	Zcwpw1-/-	DMC1
12	Mid-P	125	5	Zcwpw1-/-	DMC1
12	Mid-P	120	5	Zcwpw1-/-	DMC1
12	Mid-P	116	5	Zcwpw1-/-	DMC1
11	Mid-P	71	5	Zcwpw1-/-	DMC1
9	Mid-P	69	5	Zcwpw1-/-	DMC1
9	Mid-P	59	5	Zcwpw1-/-	DMC1
9	Mid-P	87	5	Zcwpw1-/-	DMC1
8	Mid-P	133	5	Zcwpw1-/-	DMC1
8	Mid-P	105	5	Zcwpw1-/-	DMC1
7	Mid-P	9	5	Zcwpw1-/-	DMC1
15	Mid-P	37	5	Zcwpw1-/-	DMC1
15	Mid-P	63	5	Zcwpw1-/-	DMC1
17	Mid-P	92	5	Zcwpw1-/-	DMC1
17	Mid-P	100	5	Zcwpw1-/-	DMC1
14	Mid-P	147	5	Zcwpw1-/-	DMC1
18	Late L	13	6	Zcwpw1-/-	DMC1
24	Late L	14	6	Zcwpw1-/-	DMC1
1	Early Z	68	6	Zcwpw1-/-	DMC1
10	Early Z	111	6	Zcwpw1-/-	DMC1
8	Early Z	126	6	Zcwpw1-/-	DMC1
8	Early Z	181	6	Zcwpw1-/-	DMC1
7	Early Z	102	6	Zcwpw1-/-	DMC1
14	Early Z	102	6	Zcwpw1-/-	DMC1
24	Early Z	145	6	Zcwpw1-/-	DMC1
19	Early Z	171	6	Zcwpw1-/-	DMC1
35	Early Z	240	6	Zcwpw1-/-	DMC1
34	Early Z	124	6	Zcwpw1-/-	DMC1
30	Early Z	218	6	Zcwpw1-/-	DMC1
27	Early Z	94	6	Zcwpw1-/-	DMC1
26	Early Z	255	6	Zcwpw1-/-	DMC1
50	Early Z	167	6	Zcwpw1-/-	DMC1
5	Mid-Z	139	6	Zcwpw1-/-	DMC1
5	Mid-Z	211	6	Zcwpw1-/-	DMC1
4	Mid-Z	235	6	Zcwpw1-/-	DMC1
3	Mid-Z	116	6	Zcwpw1-/-	DMC1
2	Mid-Z	46	6	Zcwpw1-/-	DMC1
2	Mid-Z	167	6	Zcwpw1-/-	DMC1
1	Mid-Z	153	6	Zcwpw1-/-	DMC1
12	Mid-Z	176	6	Zcwpw1-/-	DMC1
10	Mid-Z	125	6	Zcwpw1-/-	DMC1
8	Mid-Z	254	6	Zcwpw1-/-	DMC1
7	Mid-Z	197	6	Zcwpw1-/-	DMC1
17	Mid-Z	200	6	Zcwpw1-/-	DMC1
17	Mid-Z	182	6	Zcwpw1-/-	DMC1
15	Mid-Z	225	6	Zcwpw1-/-	DMC1
20	Mid-Z	148	6	Zcwpw1-/-	DMC1
35	Mid-Z	241	6	Zcwpw1-/-	DMC1
34	Mid-Z	281	6	Zcwpw1-/-	DMC1
34	Mid-Z	256	6	Zcwpw1-/-	DMC1
27	Mid-Z	281	6	Zcwpw1-/-	DMC1
26	Mid-Z	259	6	Zcwpw1-/-	DMC1
26	Mid-Z	233	6	Zcwpw1-/-	DMC1
26	Mid-Z	203	6	Zcwpw1-/-	DMC1
49	Mid-Z	183	6	Zcwpw1-/-	DMC1
43	Mid-Z	157	6	Zcwpw1-/-	DMC1
43	Mid-Z	252	6	Zcwpw1-/-	DMC1
43	Mid-Z	160	6	Zcwpw1-/-	DMC1
41	Mid-Z	216	6	Zcwpw1-/-	DMC1
41	Mid-Z	278	6	Zcwpw1-/-	DMC1
5	Late Z	104	6	Zcwpw1-/-	DMC1
3	Late Z	108	6	Zcwpw1-/-	DMC1
18	Late Z	154	6	Zcwpw1-/-	DMC1
18	Late Z	204	6	Zcwpw1-/-	DMC1
16	Late Z	123	6	Zcwpw1-/-	DMC1
14	Late Z	150	6	Zcwpw1-/-	DMC1
31	Late Z	176	6	Zcwpw1-/-	DMC1
28	Late Z	156	6	Zcwpw1-/-	DMC1
26	Late Z	209	6	Zcwpw1-/-	DMC1
49	Late Z	130	6	Zcwpw1-/-	DMC1
49	Late Z	105	6	Zcwpw1-/-	DMC1
38	Late Z	149	6	Zcwpw1-/-	DMC1
10	Mid-P	18	6	Zcwpw1-/-	DMC1
13	Mid-P	33	6	Zcwpw1-/-	DMC1
6	Mid-P	105	6	Zcwpw1-/-	DMC1
5	Mid-P	140	6	Zcwpw1-/-	DMC1
5	Mid-P	122	6	Zcwpw1-/-	DMC1
4	Mid-P	122	6	Zcwpw1-/-	DMC1
1	Mid-P	112	6	Zcwpw1-/-	DMC1
1	Mid-P	57	6	Zcwpw1-/-	DMC1
12	Mid-P	99	6	Zcwpw1-/-	DMC1
12	Mid-P	62	6	Zcwpw1-/-	DMC1
11	Mid-P	69	6	Zcwpw1-/-	DMC1
11	Mid-P	106	6	Zcwpw1-/-	DMC1
11	Mid-P	78	6	Zcwpw1-/-	DMC1
10	Mid-P	51	6	Zcwpw1-/-	DMC1
10	Mid-P	78	6	Zcwpw1-/-	DMC1
9	Mid-P	151	6	Zcwpw1-/-	DMC1
8	Mid-P	111	6	Zcwpw1-/-	DMC1
8	Mid-P	123	6	Zcwpw1-/-	DMC1
7	Mid-P	88	6	Zcwpw1-/-	DMC1
7	Mid-P	100	6	Zcwpw1-/-	DMC1
15	Mid-P	127	6	Zcwpw1-/-	DMC1
14	Mid-P	81	6	Zcwpw1-/-	DMC1
14	Mid-P	153	6	Zcwpw1-/-	DMC1
14	Mid-P	55	6	Zcwpw1-/-	DMC1
14	Mid-P	41	6	Zcwpw1-/-	DMC1
13	Mid-P	180	6	Zcwpw1-/-	DMC1
25	Mid-P	36	6	Zcwpw1-/-	DMC1
25	Mid-P	131	6	Zcwpw1-/-	DMC1
25	Mid-P	146	6	Zcwpw1-/-	DMC1
24	Mid-P	118	6	Zcwpw1-/-	DMC1
24	Mid-P	117	6	Zcwpw1-/-	DMC1
23	Mid-P	137	6	Zcwpw1-/-	DMC1
23	Mid-P	134	6	Zcwpw1-/-	DMC1
22	Mid-P	95	6	Zcwpw1-/-	DMC1
22	Mid-P	121	6	Zcwpw1-/-	DMC1
21	Mid-P	89	6	Zcwpw1-/-	DMC1
20	Mid-P	31	6	Zcwpw1-/-	DMC1
20	Mid-P	141	6	Zcwpw1-/-	DMC1
36	Mid-P	61	6	Zcwpw1-/-	DMC1
35	Mid-P	126	6	Zcwpw1-/-	DMC1
35	Mid-P	76	6	Zcwpw1-/-	DMC1
35	Mid-P	67	6	Zcwpw1-/-	DMC1
35	Mid-P	47	6	Zcwpw1-/-	DMC1
34	Mid-P	69	6	Zcwpw1-/-	DMC1
34	Mid-P	63	6	Zcwpw1-/-	DMC1
33	Mid-P	164	6	Zcwpw1-/-	DMC1
31	Mid-P	129	6	Zcwpw1-/-	DMC1
30	Mid-P	175	6	Zcwpw1-/-	DMC1
29	Mid-P	138	6	Zcwpw1-/-	DMC1
28	Mid-P	132	6	Zcwpw1-/-	DMC1
28	Mid-P	44	6	Zcwpw1-/-	DMC1
26	Mid-P	91	6	Zcwpw1-/-	DMC1
26	Mid-P	105	6	Zcwpw1-/-	DMC1
26	Mid-P	154	6	Zcwpw1-/-	DMC1
50	Mid-P	149	6	Zcwpw1-/-	DMC1
50	Mid-P	121	6	Zcwpw1-/-	DMC1
49	Mid-P	165	6	Zcwpw1-/-	DMC1
48	Mid-P	156	6	Zcwpw1-/-	DMC1
48	Mid-P	189	6	Zcwpw1-/-	DMC1
48	Mid-P	173	6	Zcwpw1-/-	DMC1
47	Mid-P	148	6	Zcwpw1-/-	DMC1
46	Mid-P	124	6	Zcwpw1-/-	DMC1
46	Mid-P	121	6	Zcwpw1-/-	DMC1
46	Mid-P	118	6	Zcwpw1-/-	DMC1
45	Mid-P	78	6	Zcwpw1-/-	DMC1
45	Mid-P	69	6	Zcwpw1-/-	DMC1
44	Mid-P	171	6	Zcwpw1-/-	DMC1
44	Mid-P	97	6	Zcwpw1-/-	DMC1
43	Mid-P	129	6	Zcwpw1-/-	DMC1
43	Mid-P	222	6	Zcwpw1-/-	DMC1
43	Mid-P	166	6	Zcwpw1-/-	DMC1
43	Mid-P	96	6	Zcwpw1-/-	DMC1
42	Mid-P	132	6	Zcwpw1-/-	DMC1
42	Mid-P	160	6	Zcwpw1-/-	DMC1
41	Mid-P	134	6	Zcwpw1-/-	DMC1
40	Mid-P	128	6	Zcwpw1-/-	DMC1
39	Mid-P	75	6	Zcwpw1-/-	DMC1
38	Mid-P	142	6	Zcwpw1-/-	DMC1
38	Mid-P	123	6	Zcwpw1-/-	DMC1
37	Mid-P	111	6	Zcwpw1-/-	DMC1
37	Mid-P	70	6	Zcwpw1-/-	DMC1
37	Mid-P	98	6	Zcwpw1-/-	DMC1
11	Late L	34	4	Zcwpw1-/-	DMC1
23	Late L	20	4	Zcwpw1-/-	DMC1
35	Late L	34	4	Zcwpw1-/-	DMC1
52	Late L	14	4	Zcwpw1-/-	DMC1
16	Early Z	148	4	Zcwpw1-/-	DMC1
16	Early Z	140	4	Zcwpw1-/-	DMC1
22	Early Z	238	4	Zcwpw1-/-	DMC1
37	Early Z	179	4	Zcwpw1-/-	DMC1
40	Early Z	169	4	Zcwpw1-/-	DMC1
47	Early Z	178	4	Zcwpw1-/-	DMC1
1	Mid-Z	248	4	Zcwpw1-/-	DMC1
2	Mid-Z	287	4	Zcwpw1-/-	DMC1
5	Mid-Z	281	4	Zcwpw1-/-	DMC1
7	Mid-Z	266	4	Zcwpw1-/-	DMC1
8	Mid-Z	259	4	Zcwpw1-/-	DMC1
15	Mid-Z	273	4	Zcwpw1-/-	DMC1
16	Mid-Z	272	4	Zcwpw1-/-	DMC1
17	Mid-Z	254	4	Zcwpw1-/-	DMC1
21	Mid-Z	313	4	Zcwpw1-/-	DMC1
21	Mid-Z	216	4	Zcwpw1-/-	DMC1
28	Mid-Z	203	4	Zcwpw1-/-	DMC1
30	Mid-Z	226	4	Zcwpw1-/-	DMC1
34	Mid-Z	290	4	Zcwpw1-/-	DMC1
35	Mid-Z	214	4	Zcwpw1-/-	DMC1
38	Mid-Z	91	4	Zcwpw1-/-	DMC1
38	Mid-Z	267	4	Zcwpw1-/-	DMC1
38	Mid-Z	161	4	Zcwpw1-/-	DMC1
39	Mid-Z	170	4	Zcwpw1-/-	DMC1
41	Mid-Z	255	4	Zcwpw1-/-	DMC1
42	Mid-Z	306	4	Zcwpw1-/-	DMC1
42	Mid-Z	178	4	Zcwpw1-/-	DMC1
44	Mid-Z	212	4	Zcwpw1-/-	DMC1
46	Mid-Z	285	4	Zcwpw1-/-	DMC1
52	Mid-Z	100	4	Zcwpw1-/-	DMC1
52	Mid-Z	98	4	Zcwpw1-/-	DMC1
52	Mid-Z	170	4	Zcwpw1-/-	DMC1
53	Mid-Z	280	4	Zcwpw1-/-	DMC1
11	Late Z	122	4	Zcwpw1-/-	DMC1
12	Late Z	183	4	Zcwpw1-/-	DMC1
16	Late Z	120	4	Zcwpw1-/-	DMC1
18	Late Z	124	4	Zcwpw1-/-	DMC1
25	Late Z	93	4	Zcwpw1-/-	DMC1
35	Late Z	48	4	Zcwpw1-/-	DMC1
43	Late Z	194	4	Zcwpw1-/-	DMC1
45	Late Z	118	4	Zcwpw1-/-	DMC1
49	Late Z	167	4	Zcwpw1-/-	DMC1
52	Late Z	52	4	Zcwpw1-/-	DMC1
32	Mid-P	30	4	Zcwpw1-/-	DMC1
2	Mid-P	126	4	Zcwpw1-/-	DMC1
4	Mid-P	97	4	Zcwpw1-/-	DMC1
5	Mid-P	41	4	Zcwpw1-/-	DMC1
5	Mid-P	44	4	Zcwpw1-/-	DMC1
6	Mid-P	34	4	Zcwpw1-/-	DMC1
9	Mid-P	81	4	Zcwpw1-/-	DMC1
10	Mid-P	88	4	Zcwpw1-/-	DMC1
13	Mid-P	103	4	Zcwpw1-/-	DMC1
14	Mid-P	110	4	Zcwpw1-/-	DMC1
16	Mid-P	98	4	Zcwpw1-/-	DMC1
16	Mid-P	66	4	Zcwpw1-/-	DMC1
18	Mid-P	158	4	Zcwpw1-/-	DMC1
19	Mid-P	80	4	Zcwpw1-/-	DMC1
19	Mid-P	119	4	Zcwpw1-/-	DMC1
20	Mid-P	63	4	Zcwpw1-/-	DMC1
23	Mid-P	94	4	Zcwpw1-/-	DMC1
24	Mid-P	115	4	Zcwpw1-/-	DMC1
25	Mid-P	19	4	Zcwpw1-/-	DMC1
25	Mid-P	146	4	Zcwpw1-/-	DMC1
26	Mid-P	89	4	Zcwpw1-/-	DMC1
27	Mid-P	76	4	Zcwpw1-/-	DMC1
29	Mid-P	65	4	Zcwpw1-/-	DMC1
30	Mid-P	108	4	Zcwpw1-/-	DMC1
31	Mid-P	88	4	Zcwpw1-/-	DMC1
33	Mid-P	46	4	Zcwpw1-/-	DMC1
35	Mid-P	62	4	Zcwpw1-/-	DMC1
35	Mid-P	95	4	Zcwpw1-/-	DMC1
36	Mid-P	6	4	Zcwpw1-/-	DMC1
36	Mid-P	89	4	Zcwpw1-/-	DMC1
36	Mid-P	124	4	Zcwpw1-/-	DMC1
36	Mid-P	52	4	Zcwpw1-/-	DMC1
38	Mid-P	66	4	Zcwpw1-/-	DMC1
38	Mid-P	59	4	Zcwpw1-/-	DMC1
39	Mid-P	57	4	Zcwpw1-/-	DMC1
40	Mid-P	105	4	Zcwpw1-/-	DMC1
41	Mid-P	53	4	Zcwpw1-/-	DMC1
42	Mid-P	110	4	Zcwpw1-/-	DMC1
42	Mid-P	82	4	Zcwpw1-/-	DMC1
42	Mid-P	67	4	Zcwpw1-/-	DMC1
43	Mid-P	45	4	Zcwpw1-/-	DMC1
45	Mid-P	98	4	Zcwpw1-/-	DMC1
46	Mid-P	104	4	Zcwpw1-/-	DMC1
46	Mid-P	72	4	Zcwpw1-/-	DMC1
48	Mid-P	70	4	Zcwpw1-/-	DMC1
50	Mid-P	130	4	Zcwpw1-/-	DMC1
51	Mid-P	128	4	Zcwpw1-/-	DMC1
52	Mid-P	82	4	Zcwpw1-/-	DMC1
15	Late L	4	11	Prdm9-/-	DMC1
19	Late L	17	11	Prdm9-/-	DMC1
19	Late L	19	11	Prdm9-/-	DMC1
10	Early Z	192	11	Prdm9-/-	DMC1
35	Early Z	93	11	Prdm9-/-	DMC1
38	Early Z	244	11	Prdm9-/-	DMC1
43	Early Z	142	11	Prdm9-/-	DMC1
2	Mid-Z	251	11	Prdm9-/-	DMC1
7	Mid-Z	310	11	Prdm9-/-	DMC1
9	Mid-Z	253	11	Prdm9-/-	DMC1
12	Mid-Z	305	11	Prdm9-/-	DMC1
13	Mid-Z	224	11	Prdm9-/-	DMC1
15	Mid-Z	257	11	Prdm9-/-	DMC1
15	Mid-Z	254	11	Prdm9-/-	DMC1
16	Mid-Z	301	11	Prdm9-/-	DMC1
18	Mid-Z	239	11	Prdm9-/-	DMC1
19	Mid-Z	229	11	Prdm9-/-	DMC1
19	Mid-Z	232	11	Prdm9-/-	DMC1
23	Mid-Z	314	11	Prdm9-/-	DMC1
24	Mid-Z	278	11	Prdm9-/-	DMC1
25	Mid-Z	230	11	Prdm9-/-	DMC1
25	Mid-Z	207	11	Prdm9-/-	DMC1
26	Mid-Z	191	11	Prdm9-/-	DMC1
31	Mid-Z	179	11	Prdm9-/-	DMC1
32	Mid-Z	245	11	Prdm9-/-	DMC1
38	Mid-Z	250	11	Prdm9-/-	DMC1
43	Mid-Z	210	11	Prdm9-/-	DMC1
52	Mid-Z	234	11	Prdm9-/-	DMC1
54	Mid-Z	149	11	Prdm9-/-	DMC1
56	Mid-Z	258	11	Prdm9-/-	DMC1
59	Mid-Z	226	11	Prdm9-/-	DMC1
60	Mid-Z	216	11	Prdm9-/-	DMC1
63	Mid-Z	264	11	Prdm9-/-	DMC1
65	Mid-Z	233	11	Prdm9-/-	DMC1
66	Mid-Z	192	11	Prdm9-/-	DMC1
67	Mid-Z	176	11	Prdm9-/-	DMC1
68	Mid-Z	296	11	Prdm9-/-	DMC1
68	Mid-Z	205	11	Prdm9-/-	DMC1
5	Late Z	138	11	Prdm9-/-	DMC1
6	Late Z	126	11	Prdm9-/-	DMC1
16	Late Z	165	11	Prdm9-/-	DMC1
17	Late Z	136	11	Prdm9-/-	DMC1
22	Late Z	89	11	Prdm9-/-	DMC1
23	Late Z	140	11	Prdm9-/-	DMC1
24	Late Z	205	11	Prdm9-/-	DMC1
29	Late Z	166	11	Prdm9-/-	DMC1
33	Late Z	188	11	Prdm9-/-	DMC1
36	Late Z	177	11	Prdm9-/-	DMC1
36	Late Z	119	11	Prdm9-/-	DMC1
52	Late Z	126	11	Prdm9-/-	DMC1
55	Late Z	123	11	Prdm9-/-	DMC1
58	Late Z	143	11	Prdm9-/-	DMC1
60	Late Z	165	11	Prdm9-/-	DMC1
61	Late Z	136	11	Prdm9-/-	DMC1
62	Late Z	96	11	Prdm9-/-	DMC1
64	Late Z	132	11	Prdm9-/-	DMC1
1	Mid-P	122	11	Prdm9-/-	DMC1
3	Mid-P	125	11	Prdm9-/-	DMC1
4	Mid-P	120	11	Prdm9-/-	DMC1
7	Mid-P	81	11	Prdm9-/-	DMC1
8	Mid-P	158	11	Prdm9-/-	DMC1
10	Mid-P	69	11	Prdm9-/-	DMC1
11	Mid-P	113	11	Prdm9-/-	DMC1
14	Mid-P	86	11	Prdm9-/-	DMC1
18	Mid-P	86	11	Prdm9-/-	DMC1
20	Mid-P	91	11	Prdm9-/-	DMC1
21	Mid-P	90	11	Prdm9-/-	DMC1
27	Mid-P	105	11	Prdm9-/-	DMC1
28	Mid-P	121	11	Prdm9-/-	DMC1
29	Mid-P	92	11	Prdm9-/-	DMC1
29	Mid-P	75	11	Prdm9-/-	DMC1
30	Mid-P	122	11	Prdm9-/-	DMC1
31	Mid-P	115	11	Prdm9-/-	DMC1
34	Mid-P	132	11	Prdm9-/-	DMC1
36	Mid-P	118	11	Prdm9-/-	DMC1
37	Mid-P	97	11	Prdm9-/-	DMC1
38	Mid-P	124	11	Prdm9-/-	DMC1
39	Mid-P	135	11	Prdm9-/-	DMC1
40	Mid-P	111	11	Prdm9-/-	DMC1
41	Mid-P	79	11	Prdm9-/-	DMC1
42	Mid-P	97	11	Prdm9-/-	DMC1
44	Mid-P	141	11	Prdm9-/-	DMC1
45	Mid-P	90	11	Prdm9-/-	DMC1
45	Mid-P	87	11	Prdm9-/-	DMC1
46	Mid-P	140	11	Prdm9-/-	DMC1
48	Mid-P	107	11	Prdm9-/-	DMC1
49	Mid-P	110	11	Prdm9-/-	DMC1
50	Mid-P	86	11	Prdm9-/-	DMC1
51	Mid-P	56	11	Prdm9-/-	DMC1
53	Mid-P	61	11	Prdm9-/-	DMC1
54	Mid-P	65	11	Prdm9-/-	DMC1
55	Mid-P	80	11	Prdm9-/-	DMC1
56	Mid-P	109	11	Prdm9-/-	DMC1
57	Mid-P	82	11	Prdm9-/-	DMC1
57	Mid-P	89	11	Prdm9-/-	DMC1
58	Mid-P	114	11	Prdm9-/-	DMC1
59	Mid-P	87	11	Prdm9-/-	DMC1
63	Mid-P	71	11	Prdm9-/-	DMC1
64	Mid-P	73	11	Prdm9-/-	DMC1
64	Mid-P	99	11	Prdm9-/-	DMC1
65	Mid-P	90	11	Prdm9-/-	DMC1
65	Mid-P	62	11	Prdm9-/-	DMC1
67	Mid-P	86	11	Prdm9-/-	DMC1
67	Mid-P	77	11	Prdm9-/-	DMC1
68	Mid-P	91	11	Prdm9-/-	DMC1
47	Mid-P	70	11	Prdm9-/-	DMC1
S13	Late L	66	12	Prdm9-/-	DMC1
S12	Late L	16	12	Prdm9-/-	DMC1
9	Late L	22	12	Prdm9-/-	DMC1
9	Late L	20	12	Prdm9-/-	DMC1
S25	Late L	64	12	Prdm9-/-	DMC1
S24	Late L	29	12	Prdm9-/-	DMC1
S23	Late L	16	12	Prdm9-/-	DMC1
S23	Late L	24	12	Prdm9-/-	DMC1
S23	Late L	21	12	Prdm9-/-	DMC1
30	Late L	34	12	Prdm9-/-	DMC1
S12	Early Z	149	12	Prdm9-/-	DMC1
S11	Early Z	148	12	Prdm9-/-	DMC1
S22	Early Z	127	12	Prdm9-/-	DMC1
17	Early Z	68	12	Prdm9-/-	DMC1
S27	Early Z	69	12	Prdm9-/-	DMC1
S27	Early Z	137	12	Prdm9-/-	DMC1
S26	Early Z	93	12	Prdm9-/-	DMC1
S24	Early Z	67	12	Prdm9-/-	DMC1
S35	Early Z	87	12	Prdm9-/-	DMC1
30	Early Z	101	12	Prdm9-/-	DMC1
S7	Mid-Z	118	12	Prdm9-/-	DMC1
S7	Mid-Z	130	12	Prdm9-/-	DMC1
S6	Mid-Z	209	12	Prdm9-/-	DMC1
S12	Mid-Z	202	12	Prdm9-/-	DMC1
S11	Mid-Z	131	12	Prdm9-/-	DMC1
S11	Mid-Z	141	12	Prdm9-/-	DMC1
S11	Mid-Z	225	12	Prdm9-/-	DMC1
10	Mid-Z	206	12	Prdm9-/-	DMC1
9	Mid-Z	153	12	Prdm9-/-	DMC1
9	Mid-Z	127	12	Prdm9-/-	DMC1
S22	Mid-Z	151	12	Prdm9-/-	DMC1
S21	Mid-Z	149	12	Prdm9-/-	DMC1
S21	Mid-Z	143	12	Prdm9-/-	DMC1
20	Mid-Z	147	12	Prdm9-/-	DMC1
20	Mid-Z	190	12	Prdm9-/-	DMC1
19	Mid-Z	129	12	Prdm9-/-	DMC1
19	Mid-Z	139	12	Prdm9-/-	DMC1
18	Mid-Z	136	12	Prdm9-/-	DMC1
16	Mid-Z	112	12	Prdm9-/-	DMC1
S27	Mid-Z	155	12	Prdm9-/-	DMC1
S26	Mid-Z	143	12	Prdm9-/-	DMC1
S26	Mid-Z	153	12	Prdm9-/-	DMC1
S26	Mid-Z	130	12	Prdm9-/-	DMC1
S25	Mid-Z	238	12	Prdm9-/-	DMC1
S24	Mid-Z	140	12	Prdm9-/-	DMC1
S24	Mid-Z	137	12	Prdm9-/-	DMC1
S24	Mid-Z	204	12	Prdm9-/-	DMC1
S23	Mid-Z	134	12	Prdm9-/-	DMC1
S38	Mid-Z	185	12	Prdm9-/-	DMC1
S36	Mid-Z	113	12	Prdm9-/-	DMC1
S35	Mid-Z	175	12	Prdm9-/-	DMC1
S35	Mid-Z	154	12	Prdm9-/-	DMC1
S32	Mid-Z	180	12	Prdm9-/-	DMC1
S32	Mid-Z	179	12	Prdm9-/-	DMC1
S32	Mid-Z	148	12	Prdm9-/-	DMC1
S32	Mid-Z	146	12	Prdm9-/-	DMC1
S31	Mid-Z	147	12	Prdm9-/-	DMC1
S31	Mid-Z	172	12	Prdm9-/-	DMC1
S31	Mid-Z	255	12	Prdm9-/-	DMC1
30	Mid-Z	197	12	Prdm9-/-	DMC1
S7	Late Z	112	12	Prdm9-/-	DMC1
4	Late Z	157	12	Prdm9-/-	DMC1
1	Late Z	95	12	Prdm9-/-	DMC1
1	Late Z	114	12	Prdm9-/-	DMC1
S13	Late Z	83	12	Prdm9-/-	DMC1
S11	Late Z	90	12	Prdm9-/-	DMC1
S11	Late Z	96	12	Prdm9-/-	DMC1
S22	Late Z	79	12	Prdm9-/-	DMC1
S21	Late Z	118	12	Prdm9-/-	DMC1
17	Late Z	82	12	Prdm9-/-	DMC1
15	Late Z	96	12	Prdm9-/-	DMC1
S29	Late Z	84	12	Prdm9-/-	DMC1
S29	Late Z	101	12	Prdm9-/-	DMC1
S27	Late Z	66	12	Prdm9-/-	DMC1
S26	Late Z	101	12	Prdm9-/-	DMC1
S26	Late Z	91	12	Prdm9-/-	DMC1
S25	Late Z	107	12	Prdm9-/-	DMC1
S23	Late Z	89	12	Prdm9-/-	DMC1
S38	Late Z	92	12	Prdm9-/-	DMC1
S37	Late Z	91	12	Prdm9-/-	DMC1
S36	Late Z	92	12	Prdm9-/-	DMC1
S35	Late Z	104	12	Prdm9-/-	DMC1
S35	Late Z	90	12	Prdm9-/-	DMC1
33	Late Z	92	12	Prdm9-/-	DMC1
S28	Mid-P	47	12	Prdm9-/-	DMC1
S26	Mid-P	65	12	Prdm9-/-	DMC1
S35	Mid-P	20	12	Prdm9-/-	DMC1
S7	Mid-P	30	12	Prdm9-/-	DMC1
S7	Mid-P	27	12	Prdm9-/-	DMC1
S7	Mid-P	34	12	Prdm9-/-	DMC1
S7	Mid-P	31	12	Prdm9-/-	DMC1
S6	Mid-P	58	12	Prdm9-/-	DMC1
S6	Mid-P	59	12	Prdm9-/-	DMC1
S6	Mid-P	51	12	Prdm9-/-	DMC1
5	Mid-P	68	12	Prdm9-/-	DMC1
3	Mid-P	112	12	Prdm9-/-	DMC1
3	Mid-P	110	12	Prdm9-/-	DMC1
1	Mid-P	13	12	Prdm9-/-	DMC1
14	Mid-P	90	12	Prdm9-/-	DMC1
S13	Mid-P	65	12	Prdm9-/-	DMC1
S13	Mid-P	52	12	Prdm9-/-	DMC1
S12	Mid-P	53	12	Prdm9-/-	DMC1
S12	Mid-P	87	12	Prdm9-/-	DMC1
S12	Mid-P	56	12	Prdm9-/-	DMC1
S12	Mid-P	95	12	Prdm9-/-	DMC1
S11	Mid-P	83	12	Prdm9-/-	DMC1
S11	Mid-P	60	12	Prdm9-/-	DMC1
9	Mid-P	38	12	Prdm9-/-	DMC1
8	Mid-P	50	12	Prdm9-/-	DMC1
S22	Mid-P	54	12	Prdm9-/-	DMC1
20	Mid-P	29	12	Prdm9-/-	DMC1
19	Mid-P	46	12	Prdm9-/-	DMC1
19	Mid-P	55	12	Prdm9-/-	DMC1
18	Mid-P	10	12	Prdm9-/-	DMC1
18	Mid-P	43	12	Prdm9-/-	DMC1
18	Mid-P	68	12	Prdm9-/-	DMC1
17	Mid-P	53	12	Prdm9-/-	DMC1
16	Mid-P	73	12	Prdm9-/-	DMC1
15	Mid-P	49	12	Prdm9-/-	DMC1
S28	Mid-P	72	12	Prdm9-/-	DMC1
S28	Mid-P	59	12	Prdm9-/-	DMC1
S25	Mid-P	51	12	Prdm9-/-	DMC1
S24	Mid-P	96	12	Prdm9-/-	DMC1
S24	Mid-P	73	12	Prdm9-/-	DMC1
S24	Mid-P	63	12	Prdm9-/-	DMC1
S23	Mid-P	35	12	Prdm9-/-	DMC1
S38	Mid-P	58	12	Prdm9-/-	DMC1
S38	Mid-P	80	12	Prdm9-/-	DMC1
S37	Mid-P	49	12	Prdm9-/-	DMC1
S37	Mid-P	38	12	Prdm9-/-	DMC1
S37	Mid-P	54	12	Prdm9-/-	DMC1
S37	Mid-P	57	12	Prdm9-/-	DMC1
S36	Mid-P	70	12	Prdm9-/-	DMC1
S36	Mid-P	59	12	Prdm9-/-	DMC1
S36	Mid-P	62	12	Prdm9-/-	DMC1
34	Mid-P	48	12	Prdm9-/-	DMC1
33	Mid-P	72	12	Prdm9-/-	DMC1
S32	Mid-P	40	12	Prdm9-/-	DMC1
S32	Mid-P	71	12	Prdm9-/-	DMC1
S31	Mid-P	50	12	Prdm9-/-	DMC1
S31	Mid-P	85	12	Prdm9-/-	DMC1
28	Late L	25	1	WT	DMC1
29	Late L	60	1	WT	DMC1
36	Late L	25	1	WT	DMC1
16	Early Z	48	1	WT	DMC1
29	Early Z	132	1	WT	DMC1
42	Early Z	91	1	WT	DMC1
46	Early Z	130	1	WT	DMC1
54	Early Z	34	1	WT	DMC1
1	Mid-Z	173	1	WT	DMC1
13	Mid-Z	188	1	WT	DMC1
21	Mid-Z	123	1	WT	DMC1
31	Mid-Z	141	1	WT	DMC1
40	Mid-Z	194	1	WT	DMC1
442	Mid-Z	154	1	WT	DMC1
55	Mid-Z	150	1	WT	DMC1
55	Mid-Z	177	1	WT	DMC1
60	Mid-Z	51	1	WT	DMC1
2	Mid-Z	151	1	WT	DMC1
4	Mid-Z	181	1	WT	DMC1
5	Mid-Z	133	1	WT	DMC1
5	Mid-Z	147	1	WT	DMC1
6	Mid-Z	114	1	WT	DMC1
8	Mid-Z	159	1	WT	DMC1
9	Mid-Z	47	1	WT	DMC1
9	Mid-Z	98	1	WT	DMC1
14	Mid-Z	81	1	WT	DMC1
14	Mid-Z	65	1	WT	DMC1
16	Mid-Z	60	1	WT	DMC1
17	Mid-Z	95	1	WT	DMC1
24	Mid-Z	173	1	WT	DMC1
27	Mid-Z	154	1	WT	DMC1
29	Mid-Z	159	1	WT	DMC1
29	Mid-Z	143	1	WT	DMC1
33	Mid-Z	96	1	WT	DMC1
33	Mid-Z	98	1	WT	DMC1
36	Mid-Z	70	1	WT	DMC1
37	Mid-Z	219	1	WT	DMC1
39	Mid-Z	131	1	WT	DMC1
41	Mid-Z	156	1	WT	DMC1
42	Mid-Z	114	1	WT	DMC1
42	Mid-Z	138	1	WT	DMC1
44	Mid-Z	88	1	WT	DMC1
45	Mid-Z	57	1	WT	DMC1
45	Mid-Z	93	1	WT	DMC1
46	Mid-Z	92	1	WT	DMC1
47	Mid-Z	191	1	WT	DMC1
50	Mid-Z	84	1	WT	DMC1
50	Mid-Z	152	1	WT	DMC1
52	Mid-Z	119	1	WT	DMC1
53	Mid-Z	166	1	WT	DMC1
54	Mid-Z	116	1	WT	DMC1
54	Mid-Z	152	1	WT	DMC1
56	Mid-Z	203	1	WT	DMC1
61	Mid-Z	191	1	WT	DMC1
62	Mid-Z	131	1	WT	DMC1
64	Mid-Z	152	1	WT	DMC1
66	Mid-Z	82	1	WT	DMC1
5	Late Z	105	1	WT	DMC1
10	Late Z	38	1	WT	DMC1
16	Late Z	33	1	WT	DMC1
23	Late Z	55	1	WT	DMC1
28	Late Z	64	1	WT	DMC1
50	Late Z	65	1	WT	DMC1
54	Late Z	46	1	WT	DMC1
54	Late Z	27	1	WT	DMC1
62	Late Z	76	1	WT	DMC1
63	Late Z	60	1	WT	DMC1
63	Late Z	52	1	WT	DMC1
63	Late Z	87	1	WT	DMC1
64	Late Z	67	1	WT	DMC1
66	Late Z	100	1	WT	DMC1
2	Late Z	73	1	WT	DMC1
7	Mid-P	18	1	WT	DMC1
7	Mid-P	6	1	WT	DMC1
10	Mid-P	39	1	WT	DMC1
14	Mid-P	28	1	WT	DMC1
30	Mid-P	37	1	WT	DMC1
31	Mid-P	40	1	WT	DMC1
33	Mid-P	19	1	WT	DMC1
34	Mid-P	16	1	WT	DMC1
35	Mid-P	13	1	WT	DMC1
38	Mid-P	17	1	WT	DMC1
41	Mid-P	11	1	WT	DMC1
42	Mid-P	23	1	WT	DMC1
43	Mid-P	23	1	WT	DMC1
43	Mid-P	48	1	WT	DMC1
45	Mid-P	43	1	WT	DMC1
46	Mid-P	38	1	WT	DMC1
46	Mid-P	24	1	WT	DMC1
46	Mid-P	23	1	WT	DMC1
50	Mid-P	50	1	WT	DMC1
50	Mid-P	29	1	WT	DMC1
51	Mid-P	28	1	WT	DMC1
52	Mid-P	42	1	WT	DMC1
55	Mid-P	23	1	WT	DMC1
57	Mid-P	13	1	WT	DMC1
58	Mid-P	46	1	WT	DMC1
61	Mid-P	16	1	WT	DMC1
65	Mid-P	22	1	WT	DMC1
66	Mid-P	7	1	WT	DMC1
9	Early Z	22	2	WT	DMC1
11	Early Z	84	2	WT	DMC1
31	Early Z	158	2	WT	DMC1
37	Early Z	109	2	WT	DMC1
38	Early Z	50	2	WT	DMC1
43	Early Z	97	2	WT	DMC1
44	Early Z	46	2	WT	DMC1
38	Mid-Z	179	2	WT	DMC1
52	Mid-Z	160	2	WT	DMC1
62	Mid-Z	199	2	WT	DMC1
63	Mid-Z	194	2	WT	DMC1
66	Mid-Z	163	2	WT	DMC1
1	Mid-Z	145	2	WT	DMC1
23	Mid-Z	49	2	WT	DMC1
24	Mid-Z	201	2	WT	DMC1
34	Mid-Z	210	2	WT	DMC1
35	Mid-Z	191	2	WT	DMC1
37	Mid-Z	175	2	WT	DMC1
38	Mid-Z	171	2	WT	DMC1
51	Mid-Z	98	2	WT	DMC1
52	Mid-Z	106	2	WT	DMC1
53	Mid-Z	172	2	WT	DMC1
57	Mid-Z	193	2	WT	DMC1
58	Mid-Z	186	2	WT	DMC1
58	Mid-Z	130	2	WT	DMC1
60	Mid-Z	65	2	WT	DMC1
62	Mid-Z	72	2	WT	DMC1
63	Mid-Z	166	2	WT	DMC1
65	Mid-Z	166	2	WT	DMC1
2	Late Z	97	2	WT	DMC1
14	Late Z	111	2	WT	DMC1
24	Late Z	65	2	WT	DMC1
61	Late Z	52	2	WT	DMC1
62	Late Z	86	2	WT	DMC1
64	Late Z	93	2	WT	DMC1
66	Late Z	101	2	WT	DMC1
12	Late Z	95	2	WT	DMC1
47	Late Z	60	2	WT	DMC1
53	Late Z	78	2	WT	DMC1
54	Late Z	90	2	WT	DMC1
57	Late Z	63	2	WT	DMC1
58	Late Z	64	2	WT	DMC1
60	Late Z	89	2	WT	DMC1
3	Mid-P	28	2	WT	DMC1
6	Mid-P	18	2	WT	DMC1
7	Mid-P	46	2	WT	DMC1
9	Mid-P	68	2	WT	DMC1
9	Mid-P	38	2	WT	DMC1
15	Mid-P	34	2	WT	DMC1
18	Mid-P	8	2	WT	DMC1
18	Mid-P	25	2	WT	DMC1
19	Mid-P	36	2	WT	DMC1
20	Mid-P	42	2	WT	DMC1
22	Mid-P	26	2	WT	DMC1
23	Mid-P	32	2	WT	DMC1
24	Mid-P	40	2	WT	DMC1
25	Mid-P	41	2	WT	DMC1
28	Mid-P	32	2	WT	DMC1
31	Mid-P	57	2	WT	DMC1
31	Mid-P	60	2	WT	DMC1
31	Mid-P	68	2	WT	DMC1
33	Mid-P	32	2	WT	DMC1
34	Mid-P	49	2	WT	DMC1
34	Mid-P	33	2	WT	DMC1
35	Mid-P	41	2	WT	DMC1
36	Mid-P	50	2	WT	DMC1
37	Mid-P	53	2	WT	DMC1
37	Mid-P	34	2	WT	DMC1
38	Mid-P	40	2	WT	DMC1
39	Mid-P	56	2	WT	DMC1
39	Mid-P	32	2	WT	DMC1
40	Mid-P	63	2	WT	DMC1
44	Mid-P	30	2	WT	DMC1
44	Mid-P	37	2	WT	DMC1
45	Mid-P	32	2	WT	DMC1
46	Mid-P	51	2	WT	DMC1
46	Mid-P	43	2	WT	DMC1
48	Mid-P	6	2	WT	DMC1
48	Mid-P	20	2	WT	DMC1
48	Mid-P	39	2	WT	DMC1
49	Mid-P	42	2	WT	DMC1
49	Mid-P	21	2	WT	DMC1
51	Mid-P	55	2	WT	DMC1
52	Mid-P	74	2	WT	DMC1
52	Mid-P	47	2	WT	DMC1
52	Mid-P	46	2	WT	DMC1
53	Mid-P	67	2	WT	DMC1
55	Mid-P	37	2	WT	DMC1
55	Mid-P	81	2	WT	DMC1
56	Mid-P	41	2	WT	DMC1
57	Mid-P	36	2	WT	DMC1
58	Mid-P	25	2	WT	DMC1
59	Mid-P	31	2	WT	DMC1
60	Mid-P	26	2	WT	DMC1
62	Mid-P	22	2	WT	DMC1
63	Mid-P	44	2	WT	DMC1
63	Mid-P	57	2	WT	DMC1
63	Mid-P	66	2	WT	DMC1
63	Mid-P	42	2	WT	DMC1
66	Mid-P	51	2	WT	DMC1
67	Mid-P	60	2	WT	DMC1
68	Mid-P	54	2	WT	DMC1
70	Mid-P	40	2	WT	DMC1
8	Late L	7	3	WT	DMC1
26	Late L	30	3	WT	DMC1
6	Early Z	181	3	WT	DMC1
10	Early Z	202	3	WT	DMC1
12	Early Z	118	3	WT	DMC1
30	Early Z	143	3	WT	DMC1
33	Early Z	26	3	WT	DMC1
36	Early Z	53	3	WT	DMC1
44	Early Z	98	3	WT	DMC1
47	Early Z	117	3	WT	DMC1
1	Mid-Z	141	3	WT	DMC1
3	Mid-Z	183	3	WT	DMC1
7	Mid-Z	186	3	WT	DMC1
12	Mid-Z	139	3	WT	DMC1
20	Mid-Z	121	3	WT	DMC1
26	Mid-Z	115	3	WT	DMC1
31	Mid-Z	127	3	WT	DMC1
33	Mid-Z	188	3	WT	DMC1
34	Mid-Z	203	3	WT	DMC1
34	Mid-Z	183	3	WT	DMC1
34	Mid-Z	101	3	WT	DMC1
39	Mid-Z	187	3	WT	DMC1
40	Mid-Z	188	3	WT	DMC1
42	Mid-Z	100	3	WT	DMC1
45	Mid-Z	147	3	WT	DMC1
48	Mid-Z	218	3	WT	DMC1
51	Mid-Z	137	3	WT	DMC1
52	Mid-Z	108	3	WT	DMC1
52	Mid-Z	149	3	WT	DMC1
52	Mid-Z	138	3	WT	DMC1
1	Late Z	115	3	WT	DMC1
2	Late Z	99	3	WT	DMC1
10	Late Z	11	3	WT	DMC1
13	Late Z	61	3	WT	DMC1
18	Late Z	92	3	WT	DMC1
25	Late Z	63	3	WT	DMC1
27	Late Z	80	3	WT	DMC1
28	Late Z	52	3	WT	DMC1
29	Late Z	42	3	WT	DMC1
35	Late Z	80	3	WT	DMC1
35	Late Z	82	3	WT	DMC1
36	Late Z	67	3	WT	DMC1
39	Late Z	87	3	WT	DMC1
39	Late Z	78	3	WT	DMC1
50	Late Z	125	3	WT	DMC1
50	Late Z	95	3	WT	DMC1
51	Late Z	97	3	WT	DMC1
52	Late Z	71	3	WT	DMC1
1	Mid-P	65	3	WT	DMC1
2	Mid-P	32	3	WT	DMC1
2	Mid-P	43	3	WT	DMC1
3	Mid-P	21	3	WT	DMC1
4	Mid-P	32	3	WT	DMC1
5	Mid-P	32	3	WT	DMC1
6	Mid-P	21	3	WT	DMC1
6	Mid-P	53	3	WT	DMC1
8	Mid-P	10	3	WT	DMC1
9	Mid-P	8	3	WT	DMC1
10	Mid-P	42	3	WT	DMC1
10	Mid-P	41	3	WT	DMC1
10	Mid-P	58	3	WT	DMC1
13	Mid-P	8	3	WT	DMC1
13	Mid-P	41	3	WT	DMC1
16	Mid-P	13	3	WT	DMC1
16	Mid-P	22	3	WT	DMC1
17	Mid-P	35	3	WT	DMC1
17	Mid-P	18	3	WT	DMC1
18	Mid-P	21	3	WT	DMC1
18	Mid-P	16	3	WT	DMC1
19	Mid-P	4	3	WT	DMC1
19	Mid-P	32	3	WT	DMC1
20	Mid-P	34	3	WT	DMC1
20	Mid-P	20	3	WT	DMC1
20	Mid-P	22	3	WT	DMC1
21	Mid-P	55	3	WT	DMC1
22	Mid-P	20	3	WT	DMC1
23	Mid-P	28	3	WT	DMC1
23	Mid-P	16	3	WT	DMC1
24	Mid-P	21	3	WT	DMC1
24	Mid-P	50	3	WT	DMC1
24	Mid-P	19	3	WT	DMC1
26	Mid-P	38	3	WT	DMC1
27	Mid-P	22	3	WT	DMC1
28	Mid-P	28	3	WT	DMC1
29	Mid-P	22	3	WT	DMC1
30	Mid-P	31	3	WT	DMC1
31	Mid-P	14	3	WT	DMC1
32	Mid-P	31	3	WT	DMC1
32	Mid-P	27	3	WT	DMC1
33	Mid-P	25	3	WT	DMC1
36	Mid-P	37	3	WT	DMC1
36	Mid-P	14	3	WT	DMC1
37	Mid-P	23	3	WT	DMC1
38	Mid-P	25	3	WT	DMC1
39	Mid-P	22	3	WT	DMC1
40	Mid-P	10	3	WT	DMC1
40	Mid-P	23	3	WT	DMC1
41	Mid-P	7	3	WT	DMC1
41	Mid-P	18	3	WT	DMC1
42	Mid-P	44	3	WT	DMC1
42	Mid-P	30	3	WT	DMC1
43	Mid-P	71	3	WT	DMC1
44	Mid-P	70	3	WT	DMC1
46	Mid-P	38	3	WT	DMC1
46	Mid-P	44	3	WT	DMC1
47	Mid-P	57	3	WT	DMC1
47	Mid-P	33	3	WT	DMC1
47	Mid-P	27	3	WT	DMC1
48	Mid-P	62	3	WT	DMC1
48	Mid-P	47	3	WT	DMC1
50	Mid-P	45	3	WT	DMC1
51	Mid-P	11	3	WT	DMC1
51	Mid-P	27	3	WT	DMC1
5	Mid-L	15	3	WT	RAD51
9	Mid-L	4	3	WT	RAD51
3	Early Z	36	3	WT	RAD51
8	Early Z	123	3	WT	RAD51
10	Early Z	60	3	WT	RAD51
14	Early Z	124	3	WT	RAD51
17	Early Z	32	3	WT	RAD51
32	Early Z	79	3	WT	RAD51
34	Early Z	41	3	WT	RAD51
38	Early Z	52	3	WT	RAD51
30	Mid-Z	156	3	WT	RAD51
2	Mid-Z	113	3	WT	RAD51
9	Mid-Z	69	3	WT	RAD51
9	Mid-Z	48	3	WT	RAD51
11	Mid-Z	136	3	WT	RAD51
16	Mid-Z	84	3	WT	RAD51
16	Mid-Z	91	3	WT	RAD51
18	Mid-Z	87	3	WT	RAD51
20	Mid-Z	136	3	WT	RAD51
22	Mid-Z	178	3	WT	RAD51
24	Mid-Z	202	3	WT	RAD51
25	Mid-Z	118	3	WT	RAD51
25	Mid-Z	79	3	WT	RAD51
26	Mid-Z	171	3	WT	RAD51
28	Mid-Z	176	3	WT	RAD51
29	Mid-Z	151	3	WT	RAD51
30	Mid-Z	135	3	WT	RAD51
31	Mid-Z	168	3	WT	RAD51
35	Mid-Z	51	3	WT	RAD51
37	Mid-Z	110	3	WT	RAD51
37	Mid-Z	126	3	WT	RAD51
38	Mid-Z	102	3	WT	RAD51
39	Mid-Z	106	3	WT	RAD51
40	Mid-Z	165	3	WT	RAD51
4	Late Z	70	3	WT	RAD51
5	Late Z	48	3	WT	RAD51
12	Late Z	43	3	WT	RAD51
20	Late Z	53	3	WT	RAD51
27	Late Z	91	3	WT	RAD51
28	Late Z	47	3	WT	RAD51
31	Late Z	50	3	WT	RAD51
31	Late Z	51	3	WT	RAD51
32	Late Z	69	3	WT	RAD51
32	Late Z	65	3	WT	RAD51
36	Late Z	70	3	WT	RAD51
36	Late Z	42	3	WT	RAD51
37	Late Z	94	3	WT	RAD51
40	Late Z	39	3	WT	RAD51
3	Mid-P	19	3	WT	RAD51
4	Mid-P	4	3	WT	RAD51
4	Mid-P	6	3	WT	RAD51
5	Mid-P	8	3	WT	RAD51
6	Mid-P	6	3	WT	RAD51
6	Mid-P	4	3	WT	RAD51
7	Mid-P	10	3	WT	RAD51
7	Mid-P	15	3	WT	RAD51
7	Mid-P	2	3	WT	RAD51
7	Mid-P	19	3	WT	RAD51
7	Mid-P	4	3	WT	RAD51
9	Mid-P	3	3	WT	RAD51
10	Mid-P	3	3	WT	RAD51
10	Mid-P	7	3	WT	RAD51
13	Mid-P	29	3	WT	RAD51
13	Mid-P	6	3	WT	RAD51
13	Mid-P	1	3	WT	RAD51
13	Mid-P	0	3	WT	RAD51
14	Mid-P	18	3	WT	RAD51
14	Mid-P	8	3	WT	RAD51
15	Mid-P	56	3	WT	RAD51
16	Mid-P	7	3	WT	RAD51
16	Mid-P	12	3	WT	RAD51
16	Mid-P	10	3	WT	RAD51
19	Mid-P	11	3	WT	RAD51
19	Mid-P	5	3	WT	RAD51
20	Mid-P	11	3	WT	RAD51
20	Mid-P	5	3	WT	RAD51
21	Mid-P	11	3	WT	RAD51
21	Mid-P	13	3	WT	RAD51
21	Mid-P	13	3	WT	RAD51
22	Mid-P	12	3	WT	RAD51
23	Mid-P	25	3	WT	RAD51
23	Mid-P	3	3	WT	RAD51
23	Mid-P	13	3	WT	RAD51
25	Mid-P	3	3	WT	RAD51
25	Mid-P	4	3	WT	RAD51
26	Mid-P	28	3	WT	RAD51
26	Mid-P	2	3	WT	RAD51
27	Mid-P	5	3	WT	RAD51
27	Mid-P	4	3	WT	RAD51
28	Mid-P	9	3	WT	RAD51
28	Mid-P	6	3	WT	RAD51
29	Mid-P	22	3	WT	RAD51
29	Mid-P	31	3	WT	RAD51
29	Mid-P	18	3	WT	RAD51
30	Mid-P	10	3	WT	RAD51
30	Mid-P	14	3	WT	RAD51
31	Mid-P	7	3	WT	RAD51
31	Mid-P	1	3	WT	RAD51
31	Mid-P	26	3	WT	RAD51
31	Mid-P	17	3	WT	RAD51
31	Mid-P	4	3	WT	RAD51
31	Mid-P	0	3	WT	RAD51
32	Mid-P	38	3	WT	RAD51
32	Mid-P	1	3	WT	RAD51
34	Mid-P	20	3	WT	RAD51
34	Mid-P	2	3	WT	RAD51
35	Mid-P	5	3	WT	RAD51
37	Mid-P	9	3	WT	RAD51
37	Mid-P	11	3	WT	RAD51
38	Mid-P	12	3	WT	RAD51
39	Mid-P	17	3	WT	RAD51
40	Mid-P	33	3	WT	RAD51
21	Late P	0	3	WT	RAD51
35	Late P	0	3	WT	RAD51
36	Late P	0	3	WT	RAD51
6	Late L	88	1	WT	RAD51
S17	Late L	53	1	WT	RAD51
S14	Late L	68	1	WT	RAD51
S14	Late L	71	1	WT	RAD51
S10	Late L	76	1	WT	RAD51
S22	Late L	17	1	WT	RAD51
S19	Late L	44	1	WT	RAD51
4	Early Z	134	1	WT	RAD51
S8	Early Z	110	1	WT	RAD51
S23	Early Z	144	1	WT	RAD51
S22	Early Z	130	1	WT	RAD51
S22	Early Z	101	1	WT	RAD51
S21	Early Z	78	1	WT	RAD51
S17	Mid-Z	66	1	WT	RAD51
S17	Mid-Z	85	1	WT	RAD51
16	Mid-Z	55	1	WT	RAD51
15	Mid-Z	104	1	WT	RAD51
S14	Mid-Z	105	1	WT	RAD51
13	Mid-Z	123	1	WT	RAD51
S11	Mid-Z	57	1	WT	RAD51
S22	Mid-Z	94	1	WT	RAD51
S21	Mid-Z	143	1	WT	RAD51
20	Mid-Z	160	1	WT	RAD51
S19	Mid-Z	135	1	WT	RAD51
18	Mid-Z	122	1	WT	RAD51
S17	Late Z	30	1	WT	RAD51
S17	Late Z	43	1	WT	RAD51
S10	Late Z	25	1	WT	RAD51
S10	Late Z	36	1	WT	RAD51
S19	Late Z	45	1	WT	RAD51
S19	Late Z	35	1	WT	RAD51
S19	Late Z	22	1	WT	RAD51
7	Mid-P	7	1	WT	RAD51
7	Mid-P	9	1	WT	RAD51
7	Mid-P	12	1	WT	RAD51
6	Mid-P	10	1	WT	RAD51
5	Mid-P	4	1	WT	RAD51
5	Mid-P	5	1	WT	RAD51
3	Mid-P	9	1	WT	RAD51
3	Mid-P	6	1	WT	RAD51
3	Mid-P	7	1	WT	RAD51
2	Mid-P	10	1	WT	RAD51
2	Mid-P	15	1	WT	RAD51
2	Mid-P	9	1	WT	RAD51
2	Mid-P	3	1	WT	RAD51
1	Mid-P	9	1	WT	RAD51
1	Mid-P	11	1	WT	RAD51
1	Mid-P	2	1	WT	RAD51
1	Mid-P	13	1	WT	RAD51
1	Mid-P	0	1	WT	RAD51
S17	Mid-P	15	1	WT	RAD51
S17	Mid-P	4	1	WT	RAD51
16	Mid-P	13	1	WT	RAD51
16	Mid-P	9	1	WT	RAD51
S14	Mid-P	16	1	WT	RAD51
S14	Mid-P	11	1	WT	RAD51
13	Mid-P	9	1	WT	RAD51
13	Mid-P	5	1	WT	RAD51
12	Mid-P	10	1	WT	RAD51
12	Mid-P	17	1	WT	RAD51
S10	Mid-P	8	1	WT	RAD51
S10	Mid-P	19	1	WT	RAD51
S10	Mid-P	9	1	WT	RAD51
S10	Mid-P	3	1	WT	RAD51
S8	Mid-P	5	1	WT	RAD51
S8	Mid-P	15	1	WT	RAD51
S8	Mid-P	3	1	WT	RAD51
S8	Mid-P	4	1	WT	RAD51
S8	Mid-P	19	1	WT	RAD51
S8	Mid-P	15	1	WT	RAD51
S11	Mid-P	9	1	WT	RAD51
S11	Mid-P	3	1	WT	RAD51
24	Mid-P	5	1	WT	RAD51
24	Mid-P	8	1	WT	RAD51
S23	Mid-P	10	1	WT	RAD51
S23	Mid-P	23	1	WT	RAD51
S22	Mid-P	3	1	WT	RAD51
S22	Mid-P	8	1	WT	RAD51
S22	Mid-P	4	1	WT	RAD51
S22	Mid-P	3	1	WT	RAD51
S22	Mid-P	0	1	WT	RAD51
S22	Mid-P	0	1	WT	RAD51
S21	Mid-P	4	1	WT	RAD51
S21	Mid-P	8	1	WT	RAD51
S21	Mid-P	8	1	WT	RAD51
S21	Mid-P	10	1	WT	RAD51
S21	Mid-P	3	1	WT	RAD51
20	Mid-P	3	1	WT	RAD51
S19	Mid-P	4	1	WT	RAD51
S19	Mid-P	9	1	WT	RAD51
S19	Mid-P	6	1	WT	RAD51
S19	Mid-P	13	1	WT	RAD51
S19	Mid-P	7	1	WT	RAD51
S19	Mid-P	7	1	WT	RAD51
S19	Mid-P	0	1	WT	RAD51
18	Mid-P	2	1	WT	RAD51
18	Mid-P	10	1	WT	RAD51
51	Late L	40	12	Prdm9-/-	RAD51
S46	Late L	35	12	Prdm9-/-	RAD51
S48	Late L	30	12	Prdm9-/-	RAD51
38	Late L	18	12	Prdm9-/-	RAD51
30	Late L	16	12	Prdm9-/-	RAD51
S58	Early Z	154	12	Prdm9-/-	RAD51
51	Early Z	68	12	Prdm9-/-	RAD51
51	Early Z	77	12	Prdm9-/-	RAD51
37	Early Z	133	12	Prdm9-/-	RAD51
30	Early Z	55	12	Prdm9-/-	RAD51
24	Early Z	165	12	Prdm9-/-	RAD51
S20	Early Z	79	12	Prdm9-/-	RAD51
14	Early Z	84	12	Prdm9-/-	RAD51
30	Mid-Z	30	12	Prdm9-/-	RAD51
30	Mid-Z	100	12	Prdm9-/-	RAD51
30	Mid-Z	118	12	Prdm9-/-	RAD51
24	Mid-Z	105	12	Prdm9-/-	RAD51
25	Mid-Z	96	12	Prdm9-/-	RAD51
22	Mid-Z	117	12	Prdm9-/-	RAD51
21	Mid-Z	94	12	Prdm9-/-	RAD51
S20	Mid-Z	64	12	Prdm9-/-	RAD51
19	Mid-Z	134	12	Prdm9-/-	RAD51
19	Mid-Z	161	12	Prdm9-/-	RAD51
15	Mid-Z	95	12	Prdm9-/-	RAD51
15	Mid-Z	78	12	Prdm9-/-	RAD51
15	Mid-Z	72	12	Prdm9-/-	RAD51
11	Mid-Z	103	12	Prdm9-/-	RAD51
8	Mid-Z	75	12	Prdm9-/-	RAD51
7	Mid-Z	84	12	Prdm9-/-	RAD51
7	Mid-Z	56	12	Prdm9-/-	RAD51
5	Mid-Z	113	12	Prdm9-/-	RAD51
2	Mid-Z	75	12	Prdm9-/-	RAD51
59	Mid-Z	169	12	Prdm9-/-	RAD51
59	Mid-Z	86	12	Prdm9-/-	RAD51
56	Mid-Z	110	12	Prdm9-/-	RAD51
56	Mid-Z	120	12	Prdm9-/-	RAD51
55	Mid-Z	129	12	Prdm9-/-	RAD51
54	Mid-Z	140	12	Prdm9-/-	RAD51
54	Mid-Z	87	12	Prdm9-/-	RAD51
53	Mid-Z	162	12	Prdm9-/-	RAD51
50	Mid-Z	106	12	Prdm9-/-	RAD51
50	Mid-Z	120	12	Prdm9-/-	RAD51
S46	Mid-Z	90	12	Prdm9-/-	RAD51
S46	Mid-Z	148	12	Prdm9-/-	RAD51
45	Mid-Z	110	12	Prdm9-/-	RAD51
44	Mid-Z	153	12	Prdm9-/-	RAD51
44	Mid-Z	138	12	Prdm9-/-	RAD51
39	Mid-Z	110	12	Prdm9-/-	RAD51
35	Mid-Z	119	12	Prdm9-/-	RAD51
34	Mid-Z	95	12	Prdm9-/-	RAD51
33	Mid-Z	138	12	Prdm9-/-	RAD51
32	Mid-Z	114	12	Prdm9-/-	RAD51
32	Mid-Z	97	12	Prdm9-/-	RAD51
32	Mid-Z	110	12	Prdm9-/-	RAD51
27	Late Z	47	12	Prdm9-/-	RAD51
23	Late Z	55	12	Prdm9-/-	RAD51
21	Late Z	52	12	Prdm9-/-	RAD51
21	Late Z	47	12	Prdm9-/-	RAD51
19	Late Z	28	12	Prdm9-/-	RAD51
18	Late Z	53	12	Prdm9-/-	RAD51
6	Late Z	36	12	Prdm9-/-	RAD51
2	Late Z	35	12	Prdm9-/-	RAD51
61	Late Z	58	12	Prdm9-/-	RAD51
61	Late Z	59	12	Prdm9-/-	RAD51
61	Late Z	63	12	Prdm9-/-	RAD51
60	Late Z	74	12	Prdm9-/-	RAD51
59	Late Z	10	12	Prdm9-/-	RAD51
S58	Late Z	44	12	Prdm9-/-	RAD51
S58	Late Z	61	12	Prdm9-/-	RAD51
S58	Late Z	79	12	Prdm9-/-	RAD51
56	Late Z	52	12	Prdm9-/-	RAD51
51	Late Z	38	12	Prdm9-/-	RAD51
S46	Late Z	59	12	Prdm9-/-	RAD51
42	Late Z	50	12	Prdm9-/-	RAD51
39	Late Z	47	12	Prdm9-/-	RAD51
36	Late Z	75	12	Prdm9-/-	RAD51
35	Late Z	28	12	Prdm9-/-	RAD51
61	Pseudo-P	16	12	Prdm9-/-	RAD51
61	Pseudo-P	31	12	Prdm9-/-	RAD51
60	Pseudo-P	14	12	Prdm9-/-	RAD51
59	Pseudo-P	13	12	Prdm9-/-	RAD51
S58	Pseudo-P	37	12	Prdm9-/-	RAD51
55	Pseudo-P	49	12	Prdm9-/-	RAD51
54	Pseudo-P	68	12	Prdm9-/-	RAD51
53	Pseudo-P	17	12	Prdm9-/-	RAD51
53	Pseudo-P	52	12	Prdm9-/-	RAD51
52	Pseudo-P	54	12	Prdm9-/-	RAD51
50	Pseudo-P	19	12	Prdm9-/-	RAD51
50	Pseudo-P	13	12	Prdm9-/-	RAD51
50	Pseudo-P	25	12	Prdm9-/-	RAD51
49	Pseudo-P	23	12	Prdm9-/-	RAD51
47	Pseudo-P	37	12	Prdm9-/-	RAD51
47	Pseudo-P	30	12	Prdm9-/-	RAD51
47	Pseudo-P	48	12	Prdm9-/-	RAD51
47	Pseudo-P	14	12	Prdm9-/-	RAD51
S46	Pseudo-P	16	12	Prdm9-/-	RAD51
S46	Pseudo-P	32	12	Prdm9-/-	RAD51
45	Pseudo-P	67	12	Prdm9-/-	RAD51
45	Pseudo-P	16	12	Prdm9-/-	RAD51
44	Pseudo-P	14	12	Prdm9-/-	RAD51
43	Pseudo-P	40	12	Prdm9-/-	RAD51
43	Pseudo-P	55	12	Prdm9-/-	RAD51
42	Pseudo-P	28	12	Prdm9-/-	RAD51
S48	Pseudo-P	22	12	Prdm9-/-	RAD51
S48	Pseudo-P	15	12	Prdm9-/-	RAD51
S48	Pseudo-P	41	12	Prdm9-/-	RAD51
40	Pseudo-P	16	12	Prdm9-/-	RAD51
40	Pseudo-P	52	12	Prdm9-/-	RAD51
40	Pseudo-P	51	12	Prdm9-/-	RAD51
38	Pseudo-P	9	12	Prdm9-/-	RAD51
37	Pseudo-P	22	12	Prdm9-/-	RAD51
37	Pseudo-P	19	12	Prdm9-/-	RAD51
36	Pseudo-P	20	12	Prdm9-/-	RAD51
35	Pseudo-P	17	12	Prdm9-/-	RAD51
34	Pseudo-P	16	12	Prdm9-/-	RAD51
34	Pseudo-P	36	12	Prdm9-/-	RAD51
33	Pseudo-P	12	12	Prdm9-/-	RAD51
41	Pseudo-P	6	12	Prdm9-/-	RAD51
31	Pseudo-P	5	12	Prdm9-/-	RAD51
30	Pseudo-P	5	12	Prdm9-/-	RAD51
26	Pseudo-P	9	12	Prdm9-/-	RAD51
26	Pseudo-P	21	12	Prdm9-/-	RAD51
24	Pseudo-P	19	12	Prdm9-/-	RAD51
24	Pseudo-P	24	12	Prdm9-/-	RAD51
24	Pseudo-P	14	12	Prdm9-/-	RAD51
29	Pseudo-P	27	12	Prdm9-/-	RAD51
28	Pseudo-P	25	12	Prdm9-/-	RAD51
28	Pseudo-P	37	12	Prdm9-/-	RAD51
27	Pseudo-P	28	12	Prdm9-/-	RAD51
25	Pseudo-P	11	12	Prdm9-/-	RAD51
23	Pseudo-P	12	12	Prdm9-/-	RAD51
23	Pseudo-P	17	12	Prdm9-/-	RAD51
21	Pseudo-P	38	12	Prdm9-/-	RAD51
21	Pseudo-P	24	12	Prdm9-/-	RAD51
S20	Pseudo-P	15	12	Prdm9-/-	RAD51
19	Pseudo-P	12	12	Prdm9-/-	RAD51
18	Pseudo-P	10	12	Prdm9-/-	RAD51
17	Pseudo-P	24	12	Prdm9-/-	RAD51
17	Pseudo-P	22	12	Prdm9-/-	RAD51
16	Pseudo-P	25	12	Prdm9-/-	RAD51
16	Pseudo-P	30	12	Prdm9-/-	RAD51
14	Pseudo-P	4	12	Prdm9-/-	RAD51
14	Pseudo-P	15	12	Prdm9-/-	RAD51
12	Pseudo-P	29	12	Prdm9-/-	RAD51
12	Pseudo-P	21	12	Prdm9-/-	RAD51
11	Pseudo-P	10	12	Prdm9-/-	RAD51
10	Pseudo-P	44	12	Prdm9-/-	RAD51
10	Pseudo-P	26	12	Prdm9-/-	RAD51
6	Pseudo-P	12	12	Prdm9-/-	RAD51
6	Pseudo-P	26	12	Prdm9-/-	RAD51
6	Pseudo-P	20	12	Prdm9-/-	RAD51
2	Pseudo-P	25	12	Prdm9-/-	RAD51
2	Pseudo-P	23	12	Prdm9-/-	RAD51
24	Mid-L	3	4	Zcwpw1-/-	RAD51
3	Late L	58	4	Zcwpw1-/-	RAD51
5	Late L	66	4	Zcwpw1-/-	RAD51
46	Late L	35	4	Zcwpw1-/-	RAD51
4	Early Z	138	4	Zcwpw1-/-	RAD51
8	Early Z	53	4	Zcwpw1-/-	RAD51
14	Early Z	135	4	Zcwpw1-/-	RAD51
15	Early Z	170	4	Zcwpw1-/-	RAD51
16	Early Z	50	4	Zcwpw1-/-	RAD51
17	Early Z	89	4	Zcwpw1-/-	RAD51
27	Early Z	49	4	Zcwpw1-/-	RAD51
27	Early Z	67	4	Zcwpw1-/-	RAD51
27	Early Z	56	4	Zcwpw1-/-	RAD51
30	Early Z	85	4	Zcwpw1-/-	RAD51
34	Early Z	106	4	Zcwpw1-/-	RAD51
43	Early Z	151	4	Zcwpw1-/-	RAD51
43	Early Z	158	4	Zcwpw1-/-	RAD51
44	Early Z	191	4	Zcwpw1-/-	RAD51
2	Mid-Z	254	4	Zcwpw1-/-	RAD51
3	Mid-Z	188	4	Zcwpw1-/-	RAD51
3	Mid-Z	98	4	Zcwpw1-/-	RAD51
4	Mid-Z	97	4	Zcwpw1-/-	RAD51
6	Mid-Z	144	4	Zcwpw1-/-	RAD51
10	Mid-Z	96	4	Zcwpw1-/-	RAD51
12	Mid-Z	103	4	Zcwpw1-/-	RAD51
12	Mid-Z	159	4	Zcwpw1-/-	RAD51
13	Mid-Z	101	4	Zcwpw1-/-	RAD51
14	Mid-Z	82	4	Zcwpw1-/-	RAD51
14	Mid-Z	139	4	Zcwpw1-/-	RAD51
16	Mid-Z	129	4	Zcwpw1-/-	RAD51
17	Mid-Z	176	4	Zcwpw1-/-	RAD51
18	Mid-Z	134	4	Zcwpw1-/-	RAD51
23	Mid-Z	172	4	Zcwpw1-/-	RAD51
23	Mid-Z	180	4	Zcwpw1-/-	RAD51
24	Mid-Z	123	4	Zcwpw1-/-	RAD51
25	Mid-Z	118	4	Zcwpw1-/-	RAD51
28	Mid-Z	85	4	Zcwpw1-/-	RAD51
28	Mid-Z	92	4	Zcwpw1-/-	RAD51
29	Mid-Z	88	4	Zcwpw1-/-	RAD51
30	Mid-Z	59	4	Zcwpw1-/-	RAD51
30	Mid-Z	143	4	Zcwpw1-/-	RAD51
33	Mid-Z	174	4	Zcwpw1-/-	RAD51
36	Mid-Z	140	4	Zcwpw1-/-	RAD51
36	Mid-Z	149	4	Zcwpw1-/-	RAD51
36	Mid-Z	150	4	Zcwpw1-/-	RAD51
38	Mid-Z	143	4	Zcwpw1-/-	RAD51
38	Mid-Z	181	4	Zcwpw1-/-	RAD51
38	Mid-Z	172	4	Zcwpw1-/-	RAD51
38	Mid-Z	222	4	Zcwpw1-/-	RAD51
38	Mid-Z	151	4	Zcwpw1-/-	RAD51
39	Mid-Z	132	4	Zcwpw1-/-	RAD51
39	Mid-Z	93	4	Zcwpw1-/-	RAD51
43	Mid-Z	214	4	Zcwpw1-/-	RAD51
43	Mid-Z	168	4	Zcwpw1-/-	RAD51
44	Mid-Z	175	4	Zcwpw1-/-	RAD51
45	Mid-Z	145	4	Zcwpw1-/-	RAD51
49	Mid-Z	186	4	Zcwpw1-/-	RAD51
50	Mid-Z	128	4	Zcwpw1-/-	RAD51
1	Late Z	117	4	Zcwpw1-/-	RAD51
4	Late Z	102	4	Zcwpw1-/-	RAD51
11	Late Z	65	4	Zcwpw1-/-	RAD51
11	Late Z	89	4	Zcwpw1-/-	RAD51
12	Late Z	42	4	Zcwpw1-/-	RAD51
14	Late Z	46	4	Zcwpw1-/-	RAD51
14	Late Z	22	4	Zcwpw1-/-	RAD51
15	Late Z	62	4	Zcwpw1-/-	RAD51
15	Late Z	27	4	Zcwpw1-/-	RAD51
16	Late Z	42	4	Zcwpw1-/-	RAD51
16	Late Z	39	4	Zcwpw1-/-	RAD51
16	Late Z	56	4	Zcwpw1-/-	RAD51
17	Late Z	46	4	Zcwpw1-/-	RAD51
17	Late Z	44	4	Zcwpw1-/-	RAD51
18	Late Z	57	4	Zcwpw1-/-	RAD51
18	Late Z	28	4	Zcwpw1-/-	RAD51
19	Late Z	70	4	Zcwpw1-/-	RAD51
20	Late Z	113	4	Zcwpw1-/-	RAD51
22	Late Z	89	4	Zcwpw1-/-	RAD51
29	Late Z	70	4	Zcwpw1-/-	RAD51
29	Late Z	20	4	Zcwpw1-/-	RAD51
31	Late Z	73	4	Zcwpw1-/-	RAD51
35	Late Z	59	4	Zcwpw1-/-	RAD51
43	Late Z	44	4	Zcwpw1-/-	RAD51
44	Late Z	107	4	Zcwpw1-/-	RAD51
45	Late Z	86	4	Zcwpw1-/-	RAD51
47	Late Z	39	4	Zcwpw1-/-	RAD51
48	Late Z	40	4	Zcwpw1-/-	RAD51
48	Late Z	59	4	Zcwpw1-/-	RAD51
4	Pseudo-P	36	4	Zcwpw1-/-	RAD51
5	Pseudo-P	74	4	Zcwpw1-/-	RAD51
6	Pseudo-P	14	4	Zcwpw1-/-	RAD51
7	Pseudo-P	45	4	Zcwpw1-/-	RAD51
9	Pseudo-P	10	4	Zcwpw1-/-	RAD51
10	Pseudo-P	16	4	Zcwpw1-/-	RAD51
10	Pseudo-P	32	4	Zcwpw1-/-	RAD51
12	Pseudo-P	37	4	Zcwpw1-/-	RAD51
13	Pseudo-P	39	4	Zcwpw1-/-	RAD51
14	Pseudo-P	23	4	Zcwpw1-/-	RAD51
15	Pseudo-P	16	4	Zcwpw1-/-	RAD51
16	Pseudo-P	18	4	Zcwpw1-/-	RAD51
16	Pseudo-P	16	4	Zcwpw1-/-	RAD51
20	Pseudo-P	2	4	Zcwpw1-/-	RAD51
21	Pseudo-P	42	4	Zcwpw1-/-	RAD51
24	Pseudo-P	22	4	Zcwpw1-/-	RAD51
24	Pseudo-P	34	4	Zcwpw1-/-	RAD51
26	Pseudo-P	56	4	Zcwpw1-/-	RAD51
31	Pseudo-P	37	4	Zcwpw1-/-	RAD51
32	Pseudo-P	35	4	Zcwpw1-/-	RAD51
33	Pseudo-P	22	4	Zcwpw1-/-	RAD51
38	Pseudo-P	26	4	Zcwpw1-/-	RAD51
40	Pseudo-P	53	4	Zcwpw1-/-	RAD51
41	Pseudo-P	17	4	Zcwpw1-/-	RAD51
42	Pseudo-P	35	4	Zcwpw1-/-	RAD51
44	Pseudo-P	39	4	Zcwpw1-/-	RAD51
45	Pseudo-P	49	4	Zcwpw1-/-	RAD51
50	Pseudo-P	25	4	Zcwpw1-/-	RAD51
S47	Late L	21	6	Zcwpw1-/-	RAD51
S46	Late L	21	6	Zcwpw1-/-	RAD51
23	Late L	48	6	Zcwpw1-/-	RAD51
21	Late L	19	6	Zcwpw1-/-	RAD51
18	Late L	35	6	Zcwpw1-/-	RAD51
17	Late L	96	6	Zcwpw1-/-	RAD51
S14	Late L	19	6	Zcwpw1-/-	RAD51
11	Late L	27	6	Zcwpw1-/-	RAD51
S47	Early Z	163	6	Zcwpw1-/-	RAD51
S46	Early Z	66	6	Zcwpw1-/-	RAD51
S44	Early Z	182	6	Zcwpw1-/-	RAD51
27	Early Z	111	6	Zcwpw1-/-	RAD51
23	Early Z	175	6	Zcwpw1-/-	RAD51
21	Early Z	134	6	Zcwpw1-/-	RAD51
18	Early Z	149	6	Zcwpw1-/-	RAD51
S14	Early Z	139	6	Zcwpw1-/-	RAD51
S14	Early Z	125	6	Zcwpw1-/-	RAD51
12	Early Z	99	6	Zcwpw1-/-	RAD51
11	Early Z	73	6	Zcwpw1-/-	RAD51
S52	Mid-Z	147	6	Zcwpw1-/-	RAD51
S52	Mid-Z	147	6	Zcwpw1-/-	RAD51
S52	Mid-Z	131	6	Zcwpw1-/-	RAD51
S52	Mid-Z	137	6	Zcwpw1-/-	RAD51
S47	Mid-Z	170	6	Zcwpw1-/-	RAD51
S47	Mid-Z	175	6	Zcwpw1-/-	RAD51
S46	Mid-Z	169	6	Zcwpw1-/-	RAD51
S46	Mid-Z	110	6	Zcwpw1-/-	RAD51
S45	Mid-Z	95	6	Zcwpw1-/-	RAD51
S45	Mid-Z	142	6	Zcwpw1-/-	RAD51
S45	Mid-Z	104	6	Zcwpw1-/-	RAD51
S45	Mid-Z	93	6	Zcwpw1-/-	RAD51
S39	Mid-Z	143	6	Zcwpw1-/-	RAD51
S39	Mid-Z	150	6	Zcwpw1-/-	RAD51
38	Mid-Z	122	6	Zcwpw1-/-	RAD51
29	Mid-Z	118	6	Zcwpw1-/-	RAD51
27	Mid-Z	119	6	Zcwpw1-/-	RAD51
26	Mid-Z	91	6	Zcwpw1-/-	RAD51
24	Mid-Z	114	6	Zcwpw1-/-	RAD51
24	Mid-Z	126	6	Zcwpw1-/-	RAD51
23	Mid-Z	94	6	Zcwpw1-/-	RAD51
21	Mid-Z	110	6	Zcwpw1-/-	RAD51
20	Mid-Z	93	6	Zcwpw1-/-	RAD51
12	Mid-Z	81	6	Zcwpw1-/-	RAD51
11	Mid-Z	91	6	Zcwpw1-/-	RAD51
10	Mid-Z	135	6	Zcwpw1-/-	RAD51
9	Mid-Z	87	6	Zcwpw1-/-	RAD51
1	Mid-Z	129	6	Zcwpw1-/-	RAD51
S52	Late Z	67	6	Zcwpw1-/-	RAD51
50	Late Z	87	6	Zcwpw1-/-	RAD51
S44	Late Z	34	6	Zcwpw1-/-	RAD51
S39	Late Z	66	6	Zcwpw1-/-	RAD51
37	Late Z	69	6	Zcwpw1-/-	RAD51
S36	Late Z	65	6	Zcwpw1-/-	RAD51
32	Late Z	82	6	Zcwpw1-/-	RAD51
29	Late Z	73	6	Zcwpw1-/-	RAD51
28	Late Z	67	6	Zcwpw1-/-	RAD51
26	Late Z	88	6	Zcwpw1-/-	RAD51
24	Late Z	49	6	Zcwpw1-/-	RAD51
S19	Late Z	37	6	Zcwpw1-/-	RAD51
12	Late Z	37	6	Zcwpw1-/-	RAD51
12	Late Z	56	6	Zcwpw1-/-	RAD51
4	Late Z	46	6	Zcwpw1-/-	RAD51
S52	Pseudo-P	28	6	Zcwpw1-/-	RAD51
S52	Pseudo-P	40	6	Zcwpw1-/-	RAD51
51	Pseudo-P	68	6	Zcwpw1-/-	RAD51
50	Pseudo-P	50	6	Zcwpw1-/-	RAD51
50	Pseudo-P	24	6	Zcwpw1-/-	RAD51
49	Pseudo-P	29	6	Zcwpw1-/-	RAD51
48	Pseudo-P	23	6	Zcwpw1-/-	RAD51
S47	Pseudo-P	24	6	Zcwpw1-/-	RAD51
S47	Pseudo-P	12	6	Zcwpw1-/-	RAD51
S47	Pseudo-P	42	6	Zcwpw1-/-	RAD51
S46	Pseudo-P	22	6	Zcwpw1-/-	RAD51
S46	Pseudo-P	31	6	Zcwpw1-/-	RAD51
S44	Pseudo-P	24	6	Zcwpw1-/-	RAD51
S43	Pseudo-P	19	6	Zcwpw1-/-	RAD51
S43	Pseudo-P	44	6	Zcwpw1-/-	RAD51
S40	Pseudo-P	10	6	Zcwpw1-/-	RAD51
S40	Pseudo-P	47	6	Zcwpw1-/-	RAD51
37	Pseudo-P	21	6	Zcwpw1-/-	RAD51
S35	Pseudo-P	34	6	Zcwpw1-/-	RAD51
S35	Pseudo-P	26	6	Zcwpw1-/-	RAD51
34	Pseudo-P	53	6	Zcwpw1-/-	RAD51
33	Pseudo-P	7	6	Zcwpw1-/-	RAD51
32	Pseudo-P	9	6	Zcwpw1-/-	RAD51
32	Pseudo-P	38	6	Zcwpw1-/-	RAD51
31	Pseudo-P	41	6	Zcwpw1-/-	RAD51
30	Pseudo-P	40	6	Zcwpw1-/-	RAD51
28	Pseudo-P	10	6	Zcwpw1-/-	RAD51
24	Pseudo-P	2	6	Zcwpw1-/-	RAD51
23	Pseudo-P	23	6	Zcwpw1-/-	RAD51
23	Pseudo-P	19	6	Zcwpw1-/-	RAD51
22	Pseudo-P	18	6	Zcwpw1-/-	RAD51
22	Pseudo-P	12	6	Zcwpw1-/-	RAD51
21	Pseudo-P	17	6	Zcwpw1-/-	RAD51
21	Pseudo-P	8	6	Zcwpw1-/-	RAD51
20	Pseudo-P	22	6	Zcwpw1-/-	RAD51
S19	Pseudo-P	7	6	Zcwpw1-/-	RAD51
17	Pseudo-P	34	6	Zcwpw1-/-	RAD51
16	Pseudo-P	28	6	Zcwpw1-/-	RAD51
15	Pseudo-P	49	6	Zcwpw1-/-	RAD51
S14	Pseudo-P	19	6	Zcwpw1-/-	RAD51
12	Pseudo-P	7	6	Zcwpw1-/-	RAD51
11	Pseudo-P	19	6	Zcwpw1-/-	RAD51
10	Pseudo-P	15	6	Zcwpw1-/-	RAD51
9	Pseudo-P	6	6	Zcwpw1-/-	RAD51
1	Pseudo-P	25	6	Zcwpw1-/-	RAD51
6	Pseudo-P	14	6	Zcwpw1-/-	RAD51
4	Pseudo-P	2	6	Zcwpw1-/-	RAD51
109	Early Z	218	4	Zcwpw1-/-	RPA2
S106	Early Z	253	4	Zcwpw1-/-	RPA2
S81	Early Z	131	4	Zcwpw1-/-	RPA2
S81	Early Z	257	4	Zcwpw1-/-	RPA2
76	Early Z	232	4	Zcwpw1-/-	RPA2
73	Early Z	296	4	Zcwpw1-/-	RPA2
66	Early Z	232	4	Zcwpw1-/-	RPA2
68	Early Z	306	4	Zcwpw1-/-	RPA2
64	Early Z	162	4	Zcwpw1-/-	RPA2
59	Early Z	136	4	Zcwpw1-/-	RPA2
19	Early Z	293	4	Zcwpw1-/-	RPA2
32	Early Z	15	4	Zcwpw1-/-	RPA2
110	Mid-Z	284	4	Zcwpw1-/-	RPA2
110	Mid-Z	210	4	Zcwpw1-/-	RPA2
109	Mid-Z	287	4	Zcwpw1-/-	RPA2
107	Mid-Z	377	4	Zcwpw1-/-	RPA2
104	Mid-Z	211	4	Zcwpw1-/-	RPA2
98	Mid-Z	313	4	Zcwpw1-/-	RPA2
97	Mid-Z	261	4	Zcwpw1-/-	RPA2
95	Mid-Z	346	4	Zcwpw1-/-	RPA2
93	Mid-Z	251	4	Zcwpw1-/-	RPA2
90	Mid-Z	332	4	Zcwpw1-/-	RPA2
85	Mid-Z	369	4	Zcwpw1-/-	RPA2
82	Mid-Z	209	4	Zcwpw1-/-	RPA2
S81	Mid-Z	279	4	Zcwpw1-/-	RPA2
S81	Mid-Z	369	4	Zcwpw1-/-	RPA2
S81	Mid-Z	282	4	Zcwpw1-/-	RPA2
79	Mid-Z	244	4	Zcwpw1-/-	RPA2
79	Mid-Z	262	4	Zcwpw1-/-	RPA2
78	Mid-Z	322	4	Zcwpw1-/-	RPA2
75	Mid-Z	321	4	Zcwpw1-/-	RPA2
74	Mid-Z	281	4	Zcwpw1-/-	RPA2
74	Mid-Z	214	4	Zcwpw1-/-	RPA2
S72	Mid-Z	285	4	Zcwpw1-/-	RPA2
S72	Mid-Z	265	4	Zcwpw1-/-	RPA2
S72	Mid-Z	328	4	Zcwpw1-/-	RPA2
70	Mid-Z	194	4	Zcwpw1-/-	RPA2
67	Mid-Z	104	4	Zcwpw1-/-	RPA2
64	Mid-Z	284	4	Zcwpw1-/-	RPA2
59	Mid-Z	174	4	Zcwpw1-/-	RPA2
20	Mid-Z	367	4	Zcwpw1-/-	RPA2
S18	Mid-Z	270	4	Zcwpw1-/-	RPA2
12	Mid-Z	308	4	Zcwpw1-/-	RPA2
12	Mid-Z	317	4	Zcwpw1-/-	RPA2
6	Mid-Z	362	4	Zcwpw1-/-	RPA2
40	Mid-Z	388	4	Zcwpw1-/-	RPA2
S39	Mid-Z	312	4	Zcwpw1-/-	RPA2
37	Mid-Z	340	4	Zcwpw1-/-	RPA2
S35	Mid-Z	286	4	Zcwpw1-/-	RPA2
34	Mid-Z	218	4	Zcwpw1-/-	RPA2
33	Mid-Z	204	4	Zcwpw1-/-	RPA2
24	Mid-Z	324	4	Zcwpw1-/-	RPA2
S111	Late Z	283	4	Zcwpw1-/-	RPA2
109	Late Z	201	4	Zcwpw1-/-	RPA2
S106	Late Z	183	4	Zcwpw1-/-	RPA2
101	Late Z	168	4	Zcwpw1-/-	RPA2
92	Late Z	208	4	Zcwpw1-/-	RPA2
91	Late Z	281	4	Zcwpw1-/-	RPA2
S89	Late Z	192	4	Zcwpw1-/-	RPA2
S87	Late Z	173	4	Zcwpw1-/-	RPA2
86	Late Z	283	4	Zcwpw1-/-	RPA2
S83	Late Z	176	4	Zcwpw1-/-	RPA2
S81	Late Z	189	4	Zcwpw1-/-	RPA2
S81	Late Z	113	4	Zcwpw1-/-	RPA2
S81	Late Z	185	4	Zcwpw1-/-	RPA2
S81	Late Z	242	4	Zcwpw1-/-	RPA2
S81	Late Z	218	4	Zcwpw1-/-	RPA2
S80	Late Z	192	4	Zcwpw1-/-	RPA2
S80	Late Z	136	4	Zcwpw1-/-	RPA2
79	Late Z	259	4	Zcwpw1-/-	RPA2
S72	Late Z	73	4	Zcwpw1-/-	RPA2
S72	Late Z	200	4	Zcwpw1-/-	RPA2
69	Late Z	172	4	Zcwpw1-/-	RPA2
64	Late Z	148	4	Zcwpw1-/-	RPA2
62	Late Z	174	4	Zcwpw1-/-	RPA2
21	Late Z	300	4	Zcwpw1-/-	RPA2
17	Late Z	284	4	Zcwpw1-/-	RPA2
10	Late Z	235	4	Zcwpw1-/-	RPA2
S9	Late Z	198	4	Zcwpw1-/-	RPA2
7	Late Z	256	4	Zcwpw1-/-	RPA2
6	Late Z	285	4	Zcwpw1-/-	RPA2
36	Late Z	195	4	Zcwpw1-/-	RPA2
31	Late Z	225	4	Zcwpw1-/-	RPA2
S30	Late Z	207	4	Zcwpw1-/-	RPA2
27	Late Z	203	4	Zcwpw1-/-	RPA2
26	Late Z	226	4	Zcwpw1-/-	RPA2
S39	Pseudo-P	74	4	Zcwpw1-/-	RPA2
S111	Pseudo-P	135	4	Zcwpw1-/-	RPA2
108	Pseudo-P	171	4	Zcwpw1-/-	RPA2
108	Pseudo-P	202	4	Zcwpw1-/-	RPA2
S106	Pseudo-P	125	4	Zcwpw1-/-	RPA2
105	Pseudo-P	198	4	Zcwpw1-/-	RPA2
104	Pseudo-P	90	4	Zcwpw1-/-	RPA2
104	Pseudo-P	132	4	Zcwpw1-/-	RPA2
103	Pseudo-P	149	4	Zcwpw1-/-	RPA2
101	Pseudo-P	155	4	Zcwpw1-/-	RPA2
101	Pseudo-P	131	4	Zcwpw1-/-	RPA2
99	Pseudo-P	146	4	Zcwpw1-/-	RPA2
99	Pseudo-P	114	4	Zcwpw1-/-	RPA2
99	Pseudo-P	172	4	Zcwpw1-/-	RPA2
96	Pseudo-P	157	4	Zcwpw1-/-	RPA2
94	Pseudo-P	128	4	Zcwpw1-/-	RPA2
S88	Pseudo-P	167	4	Zcwpw1-/-	RPA2
S87	Pseudo-P	188	4	Zcwpw1-/-	RPA2
S87	Pseudo-P	199	4	Zcwpw1-/-	RPA2
84	Pseudo-P	231	4	Zcwpw1-/-	RPA2
82	Pseudo-P	162	4	Zcwpw1-/-	RPA2
S80	Pseudo-P	155	4	Zcwpw1-/-	RPA2
77	Pseudo-P	187	4	Zcwpw1-/-	RPA2
S72	Pseudo-P	168	4	Zcwpw1-/-	RPA2
71	Pseudo-P	170	4	Zcwpw1-/-	RPA2
65	Pseudo-P	131	4	Zcwpw1-/-	RPA2
64	Pseudo-P	135	4	Zcwpw1-/-	RPA2
63	Pseudo-P	172	4	Zcwpw1-/-	RPA2
61	Pseudo-P	161	4	Zcwpw1-/-	RPA2
59	Pseudo-P	48	4	Zcwpw1-/-	RPA2
S18	Pseudo-P	236	4	Zcwpw1-/-	RPA2
15	Pseudo-P	199	4	Zcwpw1-/-	RPA2
14	Pseudo-P	142	4	Zcwpw1-/-	RPA2
13	Pseudo-P	195	4	Zcwpw1-/-	RPA2
S11	Pseudo-P	205	4	Zcwpw1-/-	RPA2
S11	Pseudo-P	209	4	Zcwpw1-/-	RPA2
8	Pseudo-P	147	4	Zcwpw1-/-	RPA2
5	Pseudo-P	158	4	Zcwpw1-/-	RPA2
4	Pseudo-P	152	4	Zcwpw1-/-	RPA2
S30	Pseudo-P	138	4	Zcwpw1-/-	RPA2
S30	Pseudo-P	135	4	Zcwpw1-/-	RPA2
S30	Pseudo-P	92	4	Zcwpw1-/-	RPA2
29	Pseudo-P	83	4	Zcwpw1-/-	RPA2
25	Pseudo-P	92	4	Zcwpw1-/-	RPA2
45	Late L	34	3	WT	RPA2
S53	Late L	8	3	WT	RPA2
S4	Early Z	89	3	WT	RPA2
3	Early Z	30	3	WT	RPA2
S9	Early Z	109	3	WT	RPA2
S20	Early Z	151	3	WT	RPA2
S44	Early Z	179	3	WT	RPA2
S43	Early Z	136	3	WT	RPA2
S53	Early Z	110	3	WT	RPA2
S53	Early Z	49	3	WT	RPA2
S56	Early Z	157	3	WT	RPA2
5	Mid-Z	314	3	WT	RPA2
S11	Mid-Z	275	3	WT	RPA2
18	Mid-Z	254	3	WT	RPA2
18	Mid-Z	162	3	WT	RPA2
S26	Mid-Z	168	3	WT	RPA2
S40	Mid-Z	194	3	WT	RPA2
S41	Mid-Z	262	3	WT	RPA2
S46	Mid-Z	210	3	WT	RPA2
S53	Mid-Z	203	3	WT	RPA2
S55	Mid-Z	268	3	WT	RPA2
S56	Mid-Z	225	3	WT	RPA2
S4	Late Z	165	3	WT	RPA2
6	Late Z	241	3	WT	RPA2
S11	Late Z	238	3	WT	RPA2
S14	Late Z	179	3	WT	RPA2
S22	Late Z	199	3	WT	RPA2
S29	Late Z	150	3	WT	RPA2
S38	Late Z	151	3	WT	RPA2
S46	Late Z	155	3	WT	RPA2
S55	Late Z	126	3	WT	RPA2
S58	Late Z	170	3	WT	RPA2
S4	Mid-P	7	3	WT	RPA2
S4	Mid-P	113	3	WT	RPA2
S4	Mid-P	162	3	WT	RPA2
S4	Mid-P	8	3	WT	RPA2
3	Mid-P	12	3	WT	RPA2
3	Mid-P	14	3	WT	RPA2
3	Mid-P	97	3	WT	RPA2
2	Mid-P	103	3	WT	RPA2
S10	Mid-P	147	3	WT	RPA2
S10	Mid-P	30	3	WT	RPA2
S10	Mid-P	21	3	WT	RPA2
S10	Mid-P	186	3	WT	RPA2
S9	Mid-P	41	3	WT	RPA2
S9	Mid-P	89	3	WT	RPA2
S9	Mid-P	27	3	WT	RPA2
S9	Mid-P	141	3	WT	RPA2
S9	Mid-P	120	3	WT	RPA2
8	Mid-P	25	3	WT	RPA2
8	Mid-P	2	3	WT	RPA2
7	Mid-P	93	3	WT	RPA2
6	Mid-P	2	3	WT	RPA2
5	Mid-P	29	3	WT	RPA2
S13	Mid-P	142	3	WT	RPA2
S13	Mid-P	6	3	WT	RPA2
S11	Mid-P	10	3	WT	RPA2
S11	Mid-P	77	3	WT	RPA2
S11	Mid-P	100	3	WT	RPA2
S11	Mid-P	73	3	WT	RPA2
S11	Mid-P	82	3	WT	RPA2
S11	Mid-P	3	3	WT	RPA2
S11	Mid-P	14	3	WT	RPA2
S11	Mid-P	7	3	WT	RPA2
S11	Mid-P	124	3	WT	RPA2
S14	Mid-P	12	3	WT	RPA2
S14	Mid-P	8	3	WT	RPA2
S14	Mid-P	101	3	WT	RPA2
S19	Mid-P	125	3	WT	RPA2
18	Mid-P	150	3	WT	RPA2
18	Mid-P	123	3	WT	RPA2
18	Mid-P	122	3	WT	RPA2
7	Mid-P	10	3	WT	RPA2
S21	Mid-P	29	3	WT	RPA2
S20	Mid-P	144	3	WT	RPA2
S20	Mid-P	104	3	WT	RPA2
S20	Mid-P	9	3	WT	RPA2
S22	Mid-P	107	3	WT	RPA2
S22	Mid-P	11	3	WT	RPA2
S22	Mid-P	62	3	WT	RPA2
S22	Mid-P	86	3	WT	RPA2
S22	Mid-P	9	3	WT	RPA2
S22	Mid-P	5	3	WT	RPA2
S27	Mid-P	11	3	WT	RPA2
S27	Mid-P	57	3	WT	RPA2
S27	Mid-P	112	3	WT	RPA2
S27	Mid-P	95	3	WT	RPA2
S27	Mid-P	132	3	WT	RPA2
S27	Mid-P	99	3	WT	RPA2
S27	Mid-P	7	3	WT	RPA2
S26	Mid-P	5	3	WT	RPA2
S26	Mid-P	87	3	WT	RPA2
S26	Mid-P	90	3	WT	RPA2
S26	Mid-P	11	3	WT	RPA2
S26	Mid-P	52	3	WT	RPA2
S26	Mid-P	50	3	WT	RPA2
S30	Mid-P	7	3	WT	RPA2
S29	Mid-P	113	3	WT	RPA2
S29	Mid-P	21	3	WT	RPA2
28	Mid-P	18	3	WT	RPA2
34	Mid-P	45	3	WT	RPA2
34	Mid-P	119	3	WT	RPA2
S33	Mid-P	3	3	WT	RPA2
S33	Mid-P	2	3	WT	RPA2
32	Mid-P	124	3	WT	RPA2
S31	Mid-P	86	3	WT	RPA2
S37	Mid-P	41	3	WT	RPA2
S37	Mid-P	58	3	WT	RPA2
S37	Mid-P	33	3	WT	RPA2
S36	Mid-P	31	3	WT	RPA2
S36	Mid-P	29	3	WT	RPA2
S36	Mid-P	61	3	WT	RPA2
S36	Mid-P	93	3	WT	RPA2
S36	Mid-P	1	3	WT	RPA2
S38	Mid-P	15	3	WT	RPA2
S41	Mid-P	113	3	WT	RPA2
S41	Mid-P	151	3	WT	RPA2
S41	Mid-P	152	3	WT	RPA2
45	Mid-P	105	3	WT	RPA2
45	Mid-P	37	3	WT	RPA2
45	Mid-P	84	3	WT	RPA2
45	Mid-P	9	3	WT	RPA2
45	Mid-P	8	3	WT	RPA2
45	Mid-P	15	3	WT	RPA2
S44	Mid-P	71	3	WT	RPA2
S44	Mid-P	5	3	WT	RPA2
S44	Mid-P	18	3	WT	RPA2
S43	Mid-P	47	3	WT	RPA2
48	Mid-P	3	3	WT	RPA2
47	Mid-P	0	3	WT	RPA2
S46	Mid-P	133	3	WT	RPA2
S46	Mid-P	99	3	WT	RPA2
S46	Mid-P	138	3	WT	RPA2
S46	Mid-P	2	3	WT	RPA2
S51	Mid-P	111	3	WT	RPA2
S50	Mid-P	31	3	WT	RPA2
S53	Mid-P	136	3	WT	RPA2
S52	Mid-P	99	3	WT	RPA2
S52	Mid-P	57	3	WT	RPA2
S52	Mid-P	132	3	WT	RPA2
S52	Mid-P	44	3	WT	RPA2
S55	Mid-P	104	3	WT	RPA2
S55	Mid-P	32	3	WT	RPA2
S55	Mid-P	58	3	WT	RPA2
S55	Mid-P	7	3	WT	RPA2
S55	Mid-P	5	3	WT	RPA2
S55	Mid-P	104	3	WT	RPA2
S58	Mid-P	99	3	WT	RPA2
S58	Mid-P	1	3	WT	RPA2
S58	Mid-P	11	3	WT	RPA2
S57	Mid-P	97	3	WT	RPA2
S57	Mid-P	45	3	WT	RPA2
S57	Mid-P	3	3	WT	RPA2
S57	Mid-P	103	3	WT	RPA2
S56	Mid-P	129	3	WT	RPA2
S15	Early Z	252	1	WT	RPA2
17	Early Z	327	1	WT	RPA2
34	Early Z	223	1	WT	RPA2
S59	Early Z	207	1	WT	RPA2
S85	Early Z	144	1	WT	RPA2
S78	Early Z	177	1	WT	RPA2
S19	Mid-Z	217	1	WT	RPA2
S28	Mid-Z	204	1	WT	RPA2
S25	Mid-Z	253	1	WT	RPA2
30	Mid-Z	239	1	WT	RPA2
45	Mid-Z	224	1	WT	RPA2
55	Mid-Z	70	1	WT	RPA2
S67	Mid-Z	220	1	WT	RPA2
S66	Mid-Z	247	1	WT	RPA2
S74	Mid-Z	222	1	WT	RPA2
69	Mid-Z	166	1	WT	RPA2
S90	Mid-Z	220	1	WT	RPA2
S19	Late Z	147	1	WT	RPA2
S28	Late Z	169	1	WT	RPA2
29	Late Z	141	1	WT	RPA2
36	Late Z	125	1	WT	RPA2
43	Late Z	167	1	WT	RPA2
S65	Late Z	124	1	WT	RPA2
83	Late Z	34	1	WT	RPA2
6	Mid-P	158	1	WT	RPA2
3	Mid-P	95	1	WT	RPA2
2	Mid-P	122	1	WT	RPA2
7	Mid-P	120	1	WT	RPA2
7	Mid-P	91	1	WT	RPA2
16	Mid-P	108	1	WT	RPA2
s15	Mid-P	152	1	WT	RPA2
S15	Mid-P	97	1	WT	RPA2
s15	Mid-P	69	1	WT	RPA2
13	Mid-P	67	1	WT	RPA2
22	Mid-P	103	1	WT	RPA2
S21	Mid-P	114	1	WT	RPA2
S21	Mid-P	108	1	WT	RPA2
20	Mid-P	99	1	WT	RPA2
20	Mid-P	95	1	WT	RPA2
S19	Mid-P	168	1	WT	RPA2
S19	Mid-P	105	1	WT	RPA2
S19	Mid-P	120	1	WT	RPA2
S19	Mid-P	115	1	WT	RPA2
17	Mid-P	114	1	WT	RPA2
S28	Mid-P	59	1	WT	RPA2
27	Mid-P	119	1	WT	RPA2
S26	Mid-P	99	1	WT	RPA2
S25	Mid-P	133	1	WT	RPA2
23	Mid-P	113	1	WT	RPA2
22	Mid-P	98	1	WT	RPA2
33	Mid-P	46	1	WT	RPA2
38	Mid-P	108	1	WT	RPA2
37	Mid-P	129	1	WT	RPA2
37	Mid-P	102	1	WT	RPA2
35	Mid-P	90	1	WT	RPA2
42	Mid-P	74	1	WT	RPA2
42	Mid-P	62	1	WT	RPA2
41	Mid-P	111	1	WT	RPA2
41	Mid-P	74	1	WT	RPA2
39	Mid-P	88	1	WT	RPA2
48	Mid-P	59	1	WT	RPA2
47	Mid-P	47	1	WT	RPA2
45	Mid-P	57	1	WT	RPA2
45	Mid-P	90	1	WT	RPA2
54	Mid-P	87	1	WT	RPA2
53	Mid-P	29	1	WT	RPA2
S52	Mid-P	52	1	WT	RPA2
S52	Mid-P	97	1	WT	RPA2
51	Mid-P	23	1	WT	RPA2
60	Mid-P	26	1	WT	RPA2
S59	Mid-P	61	1	WT	RPA2
S59	Mid-P	30	1	WT	RPA2
58	Mid-P	33	1	WT	RPA2
58	Mid-P	56	1	WT	RPA2
58	Mid-P	77	1	WT	RPA2
S57	Mid-P	39	1	WT	RPA2
S57	Mid-P	106	1	WT	RPA2
55	Mid-P	104	1	WT	RPA2
55	Mid-P	77	1	WT	RPA2
55	Mid-P	92	1	WT	RPA2
55	Mid-P	99	1	WT	RPA2
S65	Mid-P	79	1	WT	RPA2
64	Mid-P	82	1	WT	RPA2
63	Mid-P	64	1	WT	RPA2
62	Mid-P	18	1	WT	RPA2
61	Mid-P	36	1	WT	RPA2
61	Mid-P	71	1	WT	RPA2
75	Mid-P	84	1	WT	RPA2
S74	Mid-P	72	1	WT	RPA2
S74	Mid-P	47	1	WT	RPA2
73	Mid-P	19	1	WT	RPA2
73	Mid-P	18	1	WT	RPA2
73	Mid-P	97	1	WT	RPA2
71	Mid-P	21	1	WT	RPA2
70	Mid-P	51	1	WT	RPA2
69	Mid-P	62	1	WT	RPA2
87	Mid-P	11	1	WT	RPA2
82	Mid-P	30	1	WT	RPA2
82	Mid-P	98	1	WT	RPA2
81	Mid-P	29	1	WT	RPA2
86	Mid-P	34	1	WT	RPA2
S24	Early Z	176	2	WT	RPA2
S21	Early Z	135	2	WT	RPA2
20	Early Z	154	2	WT	RPA2
2	Early Z	180	2	WT	RPA2
10	Early Z	193	2	WT	RPA2
S9	Early Z	174	2	WT	RPA2
7	Early Z	145	2	WT	RPA2
22	Early Z	108	2	WT	RPA2
S21	Early Z	176	2	WT	RPA2
S13	Mid-Z	176	2	WT	RPA2
S13	Mid-Z	161	2	WT	RPA2
S13	Mid-Z	245	2	WT	RPA2
S24	Mid-Z	166	2	WT	RPA2
S21	Mid-Z	184	2	WT	RPA2
S28	Mid-Z	230	2	WT	RPA2
S28	Mid-Z	164	2	WT	RPA2
S39	Mid-Z	161	2	WT	RPA2
37	Mid-Z	177	2	WT	RPA2
S47	Mid-Z	155	2	WT	RPA2
44	Mid-Z	151	2	WT	RPA2
43	Mid-Z	129	2	WT	RPA2
41	Mid-Z	150	2	WT	RPA2
41	Mid-Z	167	2	WT	RPA2
10	Mid-Z	183	2	WT	RPA2
S9	Mid-Z	152	2	WT	RPA2
15	Mid-Z	208	2	WT	RPA2
6	Late Z	130	2	WT	RPA2
23	Late Z	124	2	WT	RPA2
S21	Late Z	133	2	WT	RPA2
S16	Late Z	174	2	WT	RPA2
S28	Late Z	123	2	WT	RPA2
37	Late Z	112	2	WT	RPA2
37	Late Z	135	2	WT	RPA2
49	Late Z	157	2	WT	RPA2
S47	Late Z	151	2	WT	RPA2
5	Mid-P	115	2	WT	RPA2
5	Mid-P	65	2	WT	RPA2
4	Mid-P	80	2	WT	RPA2
3	Mid-P	43	2	WT	RPA2
3	Mid-P	39	2	WT	RPA2
3	Mid-P	82	2	WT	RPA2
2	Mid-P	88	2	WT	RPA2
1	Mid-P	81	2	WT	RPA2
10	Mid-P	94	2	WT	RPA2
10	Mid-P	37	2	WT	RPA2
10	Mid-P	29	2	WT	RPA2
10	Mid-P	21	2	WT	RPA2
10	Mid-P	104	2	WT	RPA2
10	Mid-P	82	2	WT	RPA2
10	Mid-P	92	2	WT	RPA2
S9	Mid-P	164	2	WT	RPA2
S9	Mid-P	98	2	WT	RPA2
S9	Mid-P	68	2	WT	RPA2
S9	Mid-P	24	2	WT	RPA2
S9	Mid-P	113	2	WT	RPA2
8	Mid-P	63	2	WT	RPA2
8	Mid-P	88	2	WT	RPA2
8	Mid-P	12	2	WT	RPA2
8	Mid-P	132	2	WT	RPA2
7	Mid-P	14	2	WT	RPA2
7	Mid-P	85	2	WT	RPA2
6	Mid-P	77	2	WT	RPA2
6	Mid-P	89	2	WT	RPA2
6	Mid-P	92	2	WT	RPA2
15	Mid-P	40	2	WT	RPA2
15	Mid-P	49	2	WT	RPA2
15	Mid-P	49	2	WT	RPA2
14	Mid-P	39	2	WT	RPA2
14	Mid-P	48	2	WT	RPA2
S13	Mid-P	50	2	WT	RPA2
S13	Mid-P	69	2	WT	RPA2
12	Mid-P	31	2	WT	RPA2
12	Mid-P	23	2	WT	RPA2
12	Mid-P	80	2	WT	RPA2
12	Mid-P	78	2	WT	RPA2
11	Mid-P	43	2	WT	RPA2
11	Mid-P	34	2	WT	RPA2
25	Mid-P	110	2	WT	RPA2
S24	Mid-P	128	2	WT	RPA2
S24	Mid-P	89	2	WT	RPA2
S24	Mid-P	77	2	WT	RPA2
S24	Mid-P	104	2	WT	RPA2
S24	Mid-P	74	2	WT	RPA2
23	Mid-P	77	2	WT	RPA2
22	Mid-P	8	2	WT	RPA2
22	Mid-P	99	2	WT	RPA2
22	Mid-P	94	2	WT	RPA2
22	Mid-P	90	2	WT	RPA2
S21	Mid-P	71	2	WT	RPA2
S21	Mid-P	62	2	WT	RPA2
18	Mid-P	19	2	WT	RPA2
18	Mid-P	23	2	WT	RPA2
18	Mid-P	59	2	WT	RPA2
18	Mid-P	122	2	WT	RPA2
17	Mid-P	65	2	WT	RPA2
S16	Mid-P	21	2	WT	RPA2
S16	Mid-P	25	2	WT	RPA2
S16	Mid-P	79	2	WT	RPA2
S16	Mid-P	51	2	WT	RPA2
S16	Mid-P	98	2	WT	RPA2
30	Mid-P	80	2	WT	RPA2
30	Mid-P	30	2	WT	RPA2
29	Mid-P	88	2	WT	RPA2
29	Mid-P	29	2	WT	RPA2
29	Mid-P	121	2	WT	RPA2
29	Mid-P	65	2	WT	RPA2
29	Mid-P	51	2	WT	RPA2
S28	Mid-P	110	2	WT	RPA2
[truncated: 253 more rows]
