# Supplementary material for: ZCWPW1 is recruited to recombination hotspots by PRDM9 and is essential for meiotic double strand break repair
Source: eLife. 2020 Aug 3;9:e53392. doi: 10.7554/eLife.53392 (PMC7494361; doi:10.7554/eLife.53392)
Supplement: Figure 5—source data 1. — Cells were transfected with the indicated constructs (one biological replicate per sample). Each PCR reaction was carried out in triplicate (three technical replicates per sample), and the mean Ct value was used to calculate the relative expression of each gene relative to the basal expression in untransfected cells, normalised to endogenous GAPDH levels (ΔΔCt method). Formula: 2^(Ct gene in untransfected cells - Ct gene in transfected cells)/2^(Ct GAPDH in untransfected cells - Ct GAPDH in transfected cells). Expression of ZCWPW2 was only detected in cells transfected with a construct encoding hZCWPW2-HA. Stdev, standard deviation. *For calculation purposes, Cts were assigned the maximum value of 40 cycles of amplification in all samples not transfected with hZCWPW2-HA (no detectable amplification). **Gene expression was normalised to GAPDH and expressed relative to the expression in untransfected cells. [file elife-53392-fig5-data1.xlsx]

## Sheet: Fig_5_Source_Data_1
RT-PCR analysis of PRDM9, ZCWPW1 and ZCWPW2 transcript expression in HEK293T cells
Cells were transfected with the indicated constructs (1 biological replicate per sample). Each PCR reaction was carried out in triplicate (3 technical replicates per sample), and the mean Ct value was used to calculate the relative expression of each gene relative to the basal expression in untransfected cells, normalised to endogenous GAPDH levels (ΔΔCt method). Stdev, standard deviation.
Expression of ZCWPW2 was only detected in cells transfected with a contsruct encoding hZCWPW2-HA.
*for calculation purposes, Cts were assigned the maximum value of 40 cycles of amplification in all samples not transfected with hZCWPW2-HA (no detectable amplification)
	GAPDH (Ct values)					PRDM9 (Ct values)					ZCWPW1 (Ct values)					ZCWPW2 (Ct values)*
Sample	Relicate 1	Replicate 2	Replicate 3	Mean Ct	Stdev	Relicate 1	Replicate 2	Replicate 3	Mean Ct	Stdev	Relicate 1	Replicate 2	Replicate 3	Mean Ct	Stdev	Relicate 1	Replicate 2	Replicate 3	Mean Ct	Stdev
Untransfected	18.14	17.93	18.02	18.03	0.105357	30.56	30.51	30.49	30.52	0.0360555	24.86	24.28	24.47	24.5367	0.295691	40	40	40	40	0
hPRDM9-V5	18.42	18.39	18.38	18.3967	0.0208167	14.74	14.69	14.61	14.68	0.0655744	24.7	23.57	25.02	24.43	0.761774	40	40	40	40	0
hZCWPW1-HA	17.71	17.8	17.8	17.77	0.0519615	30.47	29.27	30.37	30.0367	0.665833	14.18	14.14	14.28	14.2	0.072111	40	40	40	40	0
hZCWPW1-HA + hPRDM9-V5	18.22	18.48	18.4	18.3667	0.133167	14.48	14.45	14.57	14.5	0.06245	14.84	14.81	15.7	15.1167	0.505404	40	40	40	40	0
hZCWPW2-HA	18.8	18.98	18.81	18.8633	0.10116	Not tested	Not tested	Not tested	Not tested	Not tested	Not tested	Not tested	Not tested	Not tested	Not tested	18.61	18.58	18.48	18.5567	0.0680686
Plotted values					Relative normalised expression**
	Ct mean from 3 replicates				Linear scale			Log2 scale
Sample	GAPDH	PRDM9	ZCWPW1	ZCWPW2	PRDM9	ZCWPW1	ZCWPW2	PRDM9	ZCWPW1	ZCWPW2
Untransfected	18.03	30.52	24.54	40	1	1	1	0	0	0
hPRDM9-V5	18.4	14.68	24.43	40	75804.7	1.39474	1.29235	16.21	0.48	0.37
hZCWPW1-HA	17.77	30.04	14.2	40	1.16473	1082.39	0.835088	0.22	10.08	-0.26
hZCWPW1-HA + hPRDM9-V5	18.37	14.5	15.12	40	84110.6	867.067	1.26576	16.36	9.76	0.34
hZCWPW2-HA	18.8633	Not tested	Not tested	18.56	Not tested	Not tested	5.06922e+06	Not tested	Not tested	22.2733
**gene expression was normalised to GAPDH and expressed relative to the expression in untransfected cells
Formula	2^(Ct gene in untransfected cells - Ct gene in transfected cells)/2^(Ct GAPDH in untransfected cells - Ct GAPDH in transfected cells)
